# Supplementary material for: Enantioselective synthesis of planar chiral ferrocenes via palladium-catalyzed annulation with diarylethynes
Source: publisher site journal article supplement (doi:10.3762/bjoc.9.222), 2013-09-18
Supplement: Additional file 1 [file 1860-5397-9-222-S1.pdf]

# Supporting Information

for

## **Enantioselective synthesis of planar chiral ferrocenes via palladium-catalyzed annulation with diarylethynes**

Yan-Chao Shi<sup>1</sup>, Rong-Fei Yang<sup>1,2</sup>, De-Wei Gao<sup>1</sup> and Shu-Li You\*<sup>1</sup>

Address: <sup>1</sup>State Key Laboratory of Organometallic Chemistry, Shanghai Institute of Organic Chemistry, Chinese Academy of Sciences, 345 Lingling Lu, Shanghai 200032, China and <sup>2</sup>Process Development and Manufacturing Department, Pharmaron (Beijing) Co. Ltd., 6 Taihe Road, BDA, Beijing, 100176, China

Email: Shu-Li You\* - E-mail: [slyou@sioc.ac.cn](mailto:slyou@sioc.ac.cn)

\* Corresponding author

**Experimental, characterization data and spectra.**

## Content

|                                                        |     |
|--------------------------------------------------------|-----|
| General methods                                        | S3  |
| Complete optimization data                             | S4  |
| Enantioselective synthesis of planar chiral ferrocenes | S4  |
| Synthesis of ( <i>S</i> <sub>p</sub> )- <b>L1</b>      | S15 |
| Pd-catalyzed allylic amination reaction                | S16 |
| Pd-catalyzed allylic alkylation reaction               | S17 |
| References                                             | S17 |
| Copies of NMR spectra and HPLC chromatographs          | S19 |

**General Methods.** Unless stated otherwise, all reactions were carried out in flame-dried glassware under a dry argon atmosphere. All solvents were purified and dried according to standard methods prior to use.  $^1\text{H}$  and  $^{13}\text{C}$  NMR spectra were recorded on a Varian instrument (300 MHz and 75 MHz, 400 MHz and 100 MHz, respectively) and internally referenced to tetramethylsilane signal or residual protio solvent signals. Data for  $^1\text{H}$  NMR are recorded as follows: chemical shift ( $\delta$ , ppm), multiplicity (s = singlet, d = doublet, t = triplet, m = multiplet or unresolved, br = broad singlet, coupling constant(s) in Hz, integration). Data for  $^{13}\text{C}$  NMR are reported in terms of chemical shift ( $\delta$ , ppm).

Compounds **1a–c** [1-3] were prepared by reductive amination of ferrocene aldehyde with the corresponding amines. Compound **2a** was purchased from Alfa. Compounds **2b–d** were synthesized following the reported procedures [4].

## Complete optimization data

**Table S1:** Examination of oxidants<sup>a</sup>

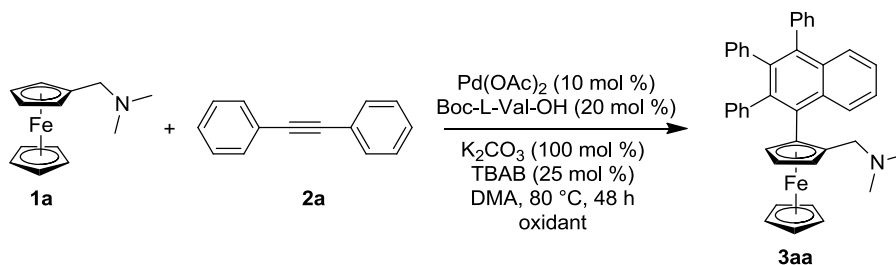

| Entry | Oxidant                         | Yield (%) <sup>b</sup> | ee (%) <sup>c</sup> |
|-------|---------------------------------|------------------------|---------------------|
| 1     | air                             | 42                     | 98%                 |
| 2     | Cu(OAc) <sub>2</sub>            | trace                  | -                   |
| 3     | Cu(OTf) <sub>2</sub>            | trace                  | -                   |
| 4     | Ag <sub>2</sub> CO <sub>3</sub> | <5                     | -                   |
| 5     | Ag <sub>2</sub> O               | <5                     | -                   |
| 6     | AgOAc                           | <5                     | -                   |
| 7     | BQ                              | 14                     | -                   |

<sup>a</sup>Reaction conditions: **1a** (0.2 mmol), **2a** (2.3 equiv), Pd(OAc)<sub>2</sub> (10 mol %), Boc-L-Val-OH (20 mol %), K<sub>2</sub>CO<sub>3</sub> (100 mol %), TBAB (25 mol %) and oxidant (2 equiv for entries 2–7 under argon) in 1.5 mL DMA. <sup>b</sup>Isolated yield. <sup>c</sup>Determined by HPLC analysis.

## General procedure for the enantioselective synthesis of planar chiral ferrocenes

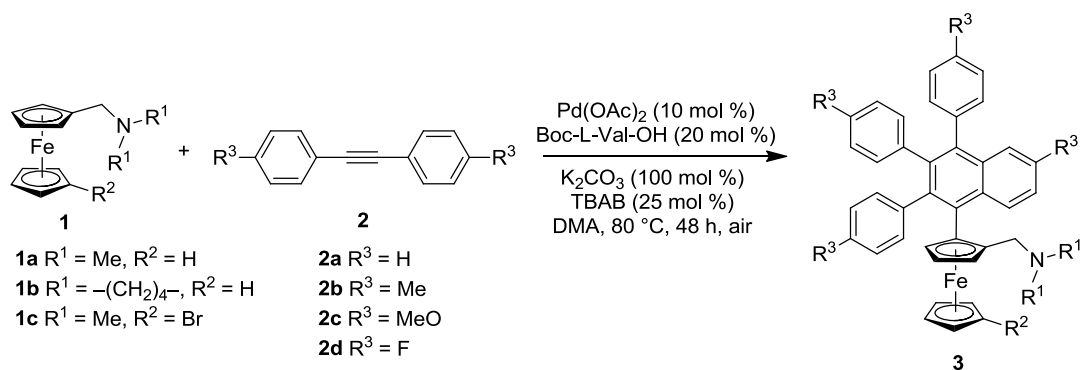

To a solution of alkyne **2** (0.46 mmol) in DMA (1.5 mL) was added Boc-L-Val-OH (8.7 mg, 0.04 mmol), Pd(OAc)<sub>2</sub> (4.5 mg, 0.02 mmol), K<sub>2</sub>CO<sub>3</sub> (27.6

mg, 0.2 mmol), TBAB (tetrabutyl ammonium bromide) (16.1 mg, 0.05 mmol) and ferrocene **1** (0.02 mmol) successively. The mixture was stirred at 80 °C under air (open flask) for 48 h. After the reaction was complete, it was then quenched with saturated aqueous NaHCO<sub>3</sub> solution and extracted with EtOAc for three times. The combined organic layers were washed with H<sub>2</sub>O and brine successively, then dried over anhydrous Na<sub>2</sub>SO<sub>4</sub> and filtrated. After the solvent was removed under reduced pressure, the residue was purified by silica gel column chromatography (ethyl acetate/petroleum ether = 1/10, v/v, 3% Et<sub>3</sub>N) to afford the desired product **3**.

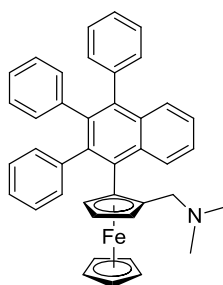

(*S<sub>p</sub>*)-1-[(*N,N*-Dimethylamino)methyl]-2-(2,3,4-triphenylnaphthalen-1-yl)ferrocene

**(3aa)**

Yellow solid (50 mg, 42% yield, 98% ee). Analytical data for **3aa**: Mp = 78–80 °C; [ $\alpha$ ]<sub>D</sub><sup>20</sup> = –91.7° (*c* = 0.26 chloroform, 98% ee). <sup>1</sup>H NMR (400 MHz, CDCl<sub>3</sub>)  $\delta$  2.23 (s, 6H), 3.13 (d, *J* = 14.0 Hz, 1H), 3.64 (d, *J* = 14.0 Hz, 1H), 3.73 (dd, *J*<sub>1</sub> = 2.4 Hz, *J*<sub>2</sub> = 1.6 Hz, 1H), 3.85 (t, *J* = 2.1 Hz, 1H), 4.21 (s, 5H), 4.50 (dd, *J*<sub>1</sub> = 2.8 Hz, *J*<sub>2</sub> = 1.6 Hz, 1H), 6.50–6.52 (m, 1H), 6.59–6.62 (m, 1H), 6.73–6.97 (series of m, 9H), 7.09 (td, *J*<sub>1</sub> = 7.2 Hz, *J*<sub>2</sub> = 0.8 Hz, 1H), 7.18 (tt, *J*<sub>1</sub> = 7.6 Hz, *J*<sub>2</sub> = 1.2 Hz, 1H), 7.36 (td, *J*<sub>1</sub> = 7.2 Hz, *J*<sub>2</sub> = 0.8 Hz, 1H), 7.43–7.50 (m, 2H), 7.63–7.70 (m, 2H), 10.18 (d, *J* = 8.0 Hz, 1H); <sup>13</sup>C NMR (100 MHz, CDCl<sub>3</sub>)  $\delta$  45.7, 58.2, 65.2, 69.1, 70.1, 71.9, 86.0, 86.9, 123.8, 125.14, 125.18, 125.7, 126.20, 126.31, 126.4, 126.6, 127.0, 127.1, 127.8, 129.0, 130.97, 131.19, 131.28, 131.39, 131.9, 132.0, 132.2, 138.4, 138.9, 139.7, 140.8, 142.1, 142.4; The enantiomeric excess was determined by phenomenex cellulose-3 (25 cm), MeOH/IPA = 90/10, 0.7 mL/min,  $\lambda$  = 214 nm, *t* (major) = 5.577 min, *t* (minor) = 9.827 min.

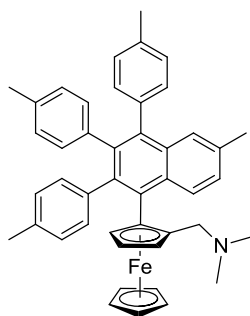

(*S<sub>p</sub>*)-1-[(*N,N*-Dimethylamino)methyl]-2-(6-methyl-2,3,4-tri-*p*-tolynaphthalen-1-yl)ferrocene (**3ab**)

Yellow solid (46 mg, 35% yield, 97% ee). Analytical data for **3ab**: Mp = 81–83 °C;  $[\alpha]_D^{20} = -176.3^\circ$  ( $c = 0.29$  chloroform, 97% ee).  $^1\text{H NMR}$  (300 MHz,  $\text{CDCl}_3$ )  $\delta$  2.10 (s, 3H), 2.14 (s, 3H), 2.22 (s, 6H), 2.33 (s, 3H), 2.45 (s, 3H), 3.05 (d,  $J = 13.8$  Hz, 1H), 3.65–3.70 (m, 2H), 3.84 (t,  $J = 2.4$  Hz, 1H), 4.17 (s, 5H), 4.50 (s, 1H), 6.35 (dd,  $J_1 = 7.8$  Hz,  $J_2 = 1.2$  Hz, 1H), 6.41 (d,  $J = 7.8$  Hz, 1H), 6.55 (d,  $J = 7.8$  Hz, 1H), 6.60–6.68 (m, 3H), 6.71–6.74 (m, 2H), 6.80 (dd,  $J_1 = 7.5$  Hz,  $J_2 = 1.2$  Hz, 1H), 6.89 (d,  $J = 8.1$  Hz, 1H), 7.15 (d,  $J = 7.8$  Hz, 1H), 7.33 (dd,  $J_1 = 7.8$  Hz,  $J_2 = 1.5$  Hz, 1H), 7.37 (s, 1H), 7.48 (dd,  $J_1 = 8.7$  Hz,  $J_2 = 1.5$  Hz, 1H), 10.00 (d,  $J = 9.0$  Hz, 1H);  $^{13}\text{C NMR}$  (100 MHz,  $\text{CDCl}_3$ )  $\delta$  21.05, 21.09, 21.3, 21.8, 45.8, 58.3, 65.1, 68.7, 69.9, 71.8, 86.3, 87.1, 125.78, 125.89, 126.98, 127.00, 127.07, 127.11, 127.7, 128.4, 129.0, 129.5, 130.8, 131.0, 131.14, 131.20, 131.31, 131.59, 131.74, 132.5, 134.0, 134.2, 134.9, 135.4, 137.0, 137.8, 138.1, 139.1, 139.3, 141.7; The enantiomeric excess was determined by phenomenex cellulose-4 (25 cm),  $\text{CH}_3\text{CN/IPA} = 95/5$ , 0.5 mL/min,  $\lambda = 254$  nm,  $t$  (major) = 10.318 min,  $t$  (minor) = 9.552 min.

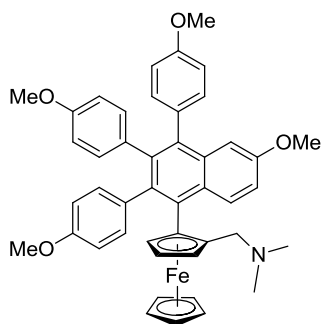

(*S<sub>p</sub>*)-1-[(*N,N*-Dimethylamino)methyl]-2-(6-methoxy-2,3,4-tris(4-methoxyphenyl)naphthalen-1-yl)ferrocene (**3ac**)

Yellow solid (64 mg, 45% yield, 99% ee). Analytical data for **3ac**: Mp = 84–86 °C;  $[\alpha]_D^{20} = -154.4^\circ$  ( $c = 0.29$  chloroform, 99% ee).  $^1\text{H}$  NMR (300 MHz,  $\text{CDCl}_3$ )  $\delta$  2.23 (s, 6H), 3.08 (d,  $J = 13.5$  Hz, 1H), 3.62 (s, 3H), 3.66 (s, 3H), 3.62–3.70 (m, 2H), 3.74 (s, 3H), 3.79 (s, 3H), 3.88 (t,  $J = 2.4$  Hz, 1H), 4.17 (s, 5H), 4.51 (s, 1H), 6.30–6.47 (series of m, 6H), 6.62–6.65 (m, 2H), 6.75 (dd,  $J_1 = 8.4$  Hz,  $J_2 = 2.1$  Hz, 1H), 6.80 (dd,  $J_1 = 8.4$  Hz,  $J_2 = 2.1$  Hz, 1H), 6.90 (dd,  $J_1 = 8.1$  Hz,  $J_2 = 2.4$  Hz, 1H), 6.95 (d,  $J = 2.7$  Hz, 1H), 7.30 (dd,  $J_1 = 9.3$  Hz,  $J_2 = 2.7$  Hz, 1H), 7.37 (dd,  $J_1 = 8.7$  Hz,  $J_2 = 2.1$  Hz, 1H), 10.06 (d,  $J = 9.3$  Hz, 1H);  $^{13}\text{C}$  NMR (100 MHz,  $\text{CDCl}_3$ )  $\delta$  45.5, 54.87, 54.98, 55.06, 55.11, 58.1, 65.4, 68.9, 70.0, 71.9, 86.3, 105.7, 111.86, 111.89, 112.01, 112.06, 112.7, 113.3, 115.6, 126.7, 130.7, 131.82, 132.00, 132.13, 132.17, 132.22, 132.36, 132.9, 133.7, 133.9, 134.8, 137.2, 139.6, 140.2, 156.7, 156.9, 157.1, 157.7; The enantiomeric excess was determined by phenomenex cellulose-4 (25 cm),  $\text{CH}_3\text{CN}/\text{IPA} = 95/5$ , 0.5 mL/min,  $\lambda = 254$  nm,  $t$  (major) = 9.818 min,  $t$  (minor) = 8.218 min.

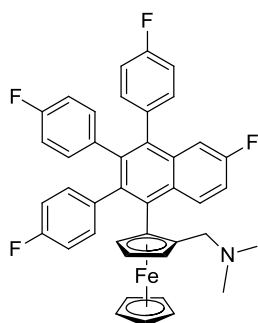

(*S<sub>p</sub>*)-1-[(*N,N*-Dimethylamino)methyl]-2-(6-fluoro-2,3,4-tris(4-fluorophenyl)naphthalen-1-yl)ferrocene (**3ad**)

Yellow solid (41 mg, 31% yield, 97% ee). Analytical data for **3ad**:  $[\alpha]_D^{20} = -62.2^\circ$  ( $c = 0.30$  chloroform, 97% ee).  $^1\text{H}$  NMR (300 MHz,  $\text{CDCl}_3$ )  $\delta$  2.18 (s, 6H), 3.10 (d,  $J = 13.2$  Hz, 1H), 3.44 (d,  $J = 13.5$  Hz, 1H), 3.66 (s, 1H), 3.91 (t,  $J = 2.4$  Hz, 1H), 4.18 (s, 5H), 4.45 (s, 1H), 6.39–6.66 (series of m, 7H), 6.79–6.86 (m, 3H), 7.08 (td,  $J_1 = 8.4$  Hz,  $J_2 = 1.5$  Hz, 1H), 7.18 (dd,  $J_1 = 11.1$  Hz,  $J_2 = 2.7$  Hz, 1H), 7.36 (td,  $J_1 = 6.6$  Hz,  $J_2 = 2.1$  Hz, 1H), 7.44 (td,  $J_1 = 8.4$  Hz,  $J_2 = 2.4$  Hz, 1H), 10.7 (dd,  $J_1 = 9.3$  Hz,  $J_2 = 6.0$  Hz, 1H);  $^{13}\text{C}$  NMR (100 MHz,  $\text{CDCl}_3$ )  $\delta$  45.6, 57.9, 65.7, 69.6, 70.1, 71.8, 85.6, 86.9,

110.1 (d,  $J = 21.5$  Hz), 113.6 (d,  $J = 21.2$  Hz), 113.74 (d,  $J = 20.8$  Hz), 113.78 (d,  $J = 20.9$  Hz), 113.9 (d,  $J = 21.0$  Hz), 114.2 (d,  $J = 26.7$  Hz), 114.6 (d,  $J = 21.4$  Hz), 115.2 (d,  $J = 20.6$  Hz), 128.3, 131.7 (d,  $J = 8.1$  Hz), 132.30, 132.38, 132.43, 132.50 (d,  $J = 8.7$  Hz), 132.62, 133.0 (d,  $J = 7.7$  Hz), 133.11, 133.6 (d,  $J = 8.0$  Hz), 134.9 (d,  $J = 3.4$  Hz), 136.2 (d,  $J = 3.1$  Hz), 137.0 (d,  $J = 5.1$  Hz), 137.5 (d,  $J = 3.7$  Hz), 139.1, 140.6, 160.65 (d,  $J = 244$  Hz), 160.74 (d,  $J = 246$  Hz), 160.76 (d,  $J = 242$  Hz), 161.6 (d,  $J = 245$  Hz);  $^{19}\text{F}$  NMR (376 MHz,  $\text{CDCl}_3$ )  $\delta$  -116.8, -116.5, -115.2, -114.0; The enantiomeric excess was determined by Daicel Chiralcel OD-H (25 cm), hexanes/IPA = 98/2, 0.3 mL/min,  $\lambda = 254$  nm,  $t$  (major) = 19.220 min,  $t$  (minor) = 16.953 min.

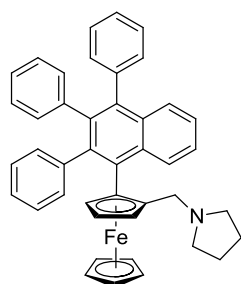

(*S<sub>p</sub>*)-1-[(Pyrrolidin-1-yl)-methyl]-2-(2,3,4-triphenylnaphthalen-1-yl)ferrocene (**3ba**)

Yellow solid (44 mg, 35% yield, 95% ee). Analytical data for **3ba**: Mp = 77–79 °C;  $[\alpha]_{\text{D}}^{20} = -101.4^\circ$  ( $c = 0.31$  chloroform, 95% ee).  $^1\text{H}$  NMR (300 MHz,  $\text{CDCl}_3$ )  $\delta$  1.79 (br, 4H), 2.53 (br, 4H), 3.32 (d,  $J = 13.8$  Hz, 1H), 3.71 (s, 1H), 3.76 (d,  $J = 13.5$  Hz, 1H), 3.85 (s, 1H), 4.22 (s, 5H), 4.50 (s, 1H), 6.50 (d,  $J = 7.2$  Hz, 1H), 6.63 (d,  $J = 6.0$  Hz, 1H), 6.73–6.98 (series of m, 9H), 7.10 (t,  $J = 7.2$  Hz, 1H), 7.18 (t,  $J = 7.5$  Hz, 1H), 7.37 (t,  $J = 7.5$  Hz, 1H), 7.42–7.51 (m, 2H), 7.63–7.70 (m, 2H), 10.22 (d,  $J = 9.0$  Hz, 1H);  $^{13}\text{C}$  NMR (100 MHz,  $\text{CDCl}_3$ )  $\delta$  23.4, 54.2, 54.5, 65.1, 68.8, 69.6, 70.0, 71.7, 85.8, 123.8, 125.1, 125.6, 126.21, 126.28, 126.38, 126.40, 126.5, 127.0, 127.1, 127.7, 129.0, 130.9, 131.17, 131.25, 131.36, 131.39, 131.8, 132.1, 132.2, 138.3, 138.8, 139.7, 140.7, 142.1, 142.4; IR (film) 3445, 3055, 2959, 2775, 1651, 1601, 1491, 1441, 1373, 1107, 1031, 1002, 819, 754, 699  $\text{cm}^{-1}$ ; HRMS (ESI): Exact mass calcd for  $\text{C}_{43}\text{H}_{38}\text{FeN}^+$  (M+H) requires  $m/z$  624.2348, found  $m/z$  624.2339. The enantiomeric excess was determined by phenomenex cellulose-3 (25 cm),  $\text{CH}_3\text{CN}/\text{IPA} = 95/5$ , 0.5 mL/min,  $\lambda = 254$  nm,  $t$  (major) = 6.917 min,  $t$  (minor) = 7.473 min.



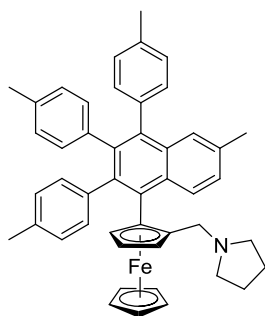

(*S<sub>p</sub>*)-1-(Pyrrolidin-1-yl-methyl)-2-(6-methyl-2,3,4-tri-p-tolyl-naphthalen-1-yl)ferrocene  
**(3bb)**

Yellow solid (41 mg, 30% yield, 97% ee). Analytical data for **3bb**: Mp = 84–86 °C;  $[\alpha]_D^{20} = -157.7^\circ$  ( $c = 0.31$  chloroform, 97% ee).  $^1\text{H NMR}$  (400 MHz,  $\text{CDCl}_3$ )  $\delta$  1.77 (br, 4H), 2.10 (s, 3H), 2.14 (s, 3H), 2.33 (s, 3H), 2.45 (s, 3H), 2.52 (br, 4H), 3.25 (d,  $J = 13.6$  Hz, 1H), 3.67 (dd,  $J_1 = 2.0$  Hz,  $J_2 = 1.2$  Hz, 1H), 3.78 (d,  $J = 13.6$  Hz, 1H), 3.82–3.83 (m, 1H), 4.18 (s, 5H), 4.49 (s, 1H), 6.36 (dd,  $J_1 = 8.0$  Hz,  $J_2 = 1.6$  Hz, 1H), 6.43–6.45 (m, 1H), 6.55 (d,  $J = 8.0$  Hz, 1H), 6.61–6.65 (m, 3H), 6.69–6.73 (m, 2H), 6.81 (dd,  $J_1 = 8.0$  Hz,  $J_2 = 1.6$  Hz, 1H), 6.89 (d,  $J = 7.2$  Hz, 1H), 7.17 (d,  $J = 7.6$  Hz, 1H), 7.37 (dd,  $J_1 = 7.6$  Hz,  $J_2 = 1.6$  Hz, 1H), 7.38 (s, 1H), 7.48 (dd,  $J_1 = 8.8$  Hz,  $J_2 = 1.6$  Hz, 1H), 10.04 (d,  $J = 8.8$  Hz, 1H);  $^{13}\text{C NMR}$  (100 MHz,  $\text{CDCl}_3$ )  $\delta$  21.06, 21.09, 21.3, 21.8, 23.5, 54.3, 54.5, 65.0, 68.5, 69.9, 71.6, 86.2, 125.77, 125.83, 126.94, 127.01, 127.09, 127.11, 127.7, 128.4, 129.0, 129.5, 130.8, 131.0, 131.20, 131.23, 131.34, 131.67, 131.69, 132.5, 134.01, 134.11, 134.9, 135.3, 137.0, 137.7, 138.1, 139.0, 139.3, 141.7; IR (film) 3440, 3020, 2920, 2871, 2776, 1622, 1511, 1447, 1375, 1347, 1183, 1107, 833, 815, 731  $\text{cm}^{-1}$ ; HRMS (ESI): Exact mass calcd for  $\text{C}_{47}\text{H}_{46}\text{FeN}^+$  ( $\text{M}+\text{H}$ ) requires  $m/z$  680.2974, found  $m/z$  680.2971. The enantiomeric excess was determined by phenomenex cellulose-4 (25 cm),  $\text{CH}_3\text{CN}/\text{IPA} = 95/5$ , 0.5 mL/min,  $\lambda = 254$  nm,  $t$  (major) = 11.327 min,  $t$  (minor) = 9.835 min.

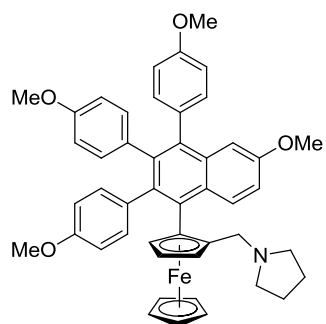

(*S<sub>p</sub>*)-1-[(Pyrrolidin-1-yl)-methyl]-2-(6-methoxy-2,3,4-tris(4-methoxyphenyl)naphthalen-1-yl)ferrocene (**3bc**)

Yellow solid (61 mg, 41% yield, 97% ee). Analytical data for **3bc**: Mp = 87–89 °C;  $[\alpha]_D^{20} = -174.3^\circ$  ( $c = 0.30$  chloroform, 97% ee).  $^1\text{H NMR}$  (300 MHz,  $\text{CDCl}_3$ )  $\delta$  1.77 (br, 4H), 2.51 (br, 4H), 3.24 (d,  $J = 13.5$  Hz, 1H), 3.62 (s, 3H), 3.66 (s, 3H), 3.74 (s, 3H), 3.79 (s, 3H), 3.69–3.89 (series of m, 3H), 4.17 (s, 5H), 4.47 (s, 1H), 6.31–6.47 (series of m, 6H), 6.60–6.65 (m, 2H), 6.75 (d,  $J = 8.7$  Hz, 1H), 6.81 (d,  $J = 8.4$  Hz, 1H), 6.91 (dd,  $J_1 = 8.4$  Hz,  $J_2 = 2.4$  Hz, 1H), 7.95 (d,  $J = 2.4$  Hz, 1H), 7.30 (dd,  $J_1 = 9.3$  Hz,  $J_2 = 2.4$  Hz, 1H), 7.38 (d,  $J = 8.4$  Hz, 1H), 10.11 (d,  $J = 9.3$  Hz, 1H);  $^{13}\text{C NMR}$  (75 MHz,  $\text{CDCl}_3$ )  $\delta$  23.4, 54.1, 54.5, 54.78, 54.89, 54.97, 55.02, 65.1, 68.5, 69.4, 69.8, 71.5, 86.1, 87.8, 105.5, 111.8, 112.0, 112.6, 113.2, 115.4, 126.7, 130.8, 131.9, 132.11, 132.18, 132.31, 132.34, 132.7, 133.6, 133.8, 134.8, 137.0, 139.4, 140.1, 156.6, 156.8, 157.0, 157.6; IR (film) 3423, 2932, 2833, 2776, 1609, 1509, 1459, 1286, 1245, 1176, 1107, 1035, 827, 774  $\text{cm}^{-1}$ ; HRMS (ESI): Exact mass calcd for  $\text{C}_{47}\text{H}_{46}\text{FeNO}_4^{+1}$  (M+H) requires  $m/z$  744.2771, found  $m/z$  744.2770. The enantiomeric excess was determined by phenomenex cellulose-4 (25 cm),  $\text{CH}_3\text{CN}/\text{IPA} = 95/5$ , 0.5 mL/min,  $\lambda = 254$  nm,  $t$  (major) = 11.677 min,  $t$  (minor) = 8.627 min.

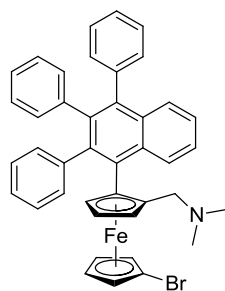

(*S<sub>p</sub>*)-1-[(*N,N*-Dimethylamino)methyl]-2-(2,3,4-triphenylnaphthalen-1-yl)-1'-bromoferrocene (**3ca**)

Yellow solid (85 mg, 42% yield, 96% ee). Analytical data for **3ca**: Mp = 82–84 °C;  $[\alpha]_D^{20} = -13.3^\circ$  ( $c = 0.15$  chloroform, 96% ee).  $^1\text{H NMR}$  (400 MHz,  $\text{CDCl}_3$ )  $\delta$  2.31 (s, 6H), 3.12 (d,  $J = 14.0$  Hz, 1H), 3.79 (d,  $J = 14.0$  Hz, 1H), 3.89 (s, 1H), 3.94 (t,  $J = 2.4$  Hz, 1H), 3.86 (d,  $J = 1.2$  Hz, 1H), 4.23 (d,  $J = 0.8$  Hz, 1H), 4.47 (d,  $J = 1.2$  Hz, 1H), 4.49 (d,  $J = 0.8$  Hz, 1H), 4.67 (s, 1H), 6.61 (d,  $J = 7.6$  Hz, 1H), 6.74 (t,  $J = 2.8$  Hz, 1H), 6.80–6.98 (series of m, 8H), 7.05 (d,  $J = 8.0$  Hz, 1H), 7.14 (t,  $J = 7.6$  Hz, 1H), 7.23 (t,  $J = 7.6$  Hz, 1H), 7.42 (t,  $J = 7.6$  Hz, 1H), 7.51 (t,  $J = 7.6$  Hz, 1H), 7.56 (d,  $J = 8.0$  Hz, 1H), 7.74 (d,  $J = 8.0$  Hz, 1H), 7.80 (t,  $J = 7.6$  Hz, 1H), 10.01 (d,  $J = 8.4$  Hz, 1H);  $^{13}\text{C NMR}$  (100 MHz,  $\text{CDCl}_3$ )  $\delta$  46.0, 56.6, 68.4, 68.6, 69.5, 70.3, 71.7, 73.4, 74.3, 79.6, 87.6, 88.6, 124.2, 125.28, 125.39, 125.9, 126.46, 126.54, 126.58, 126.74, 127.2, 127.9, 128.9, 131.0, 131.23, 131.25, 131.35, 131.45, 131.93, 132.23, 138.7, 139.0, 139.7, 140.8, 142.1, 142.6; IR (film) 3056, 2941, 2814, 2765, 1602, 1491, 1442, 1370, 1265, 1152, 1072, 1024, 872, 789, 772, 755, 737, 700, 624  $\text{cm}^{-1}$ ; HRMS (ESI): Exact mass calcd for  $\text{C}_{41}\text{H}_{35}\text{BrFeN}^{+1}$  ( $\text{M}+\text{H}$ ) requires  $m/z$  676.1297, found  $m/z$  676.1287. The enantiomeric excess was determined by Daicel Chiralcel OD-H (25 cm), hexanes/IPA = 98/2, 0.4 mL/min,  $\lambda = 254$  nm,  $t$  (major) = 16.438 min,  $t$  (minor) = 14.545 min.

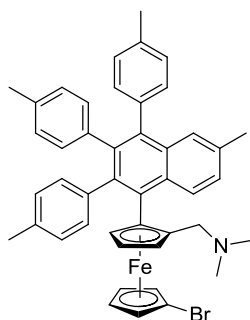

(*S*)-1-[(*N,N*-Dimethylamino)methyl]-2-(6-methyl-2,3,4-tri-*p*-tolyl-naphthalen-1-yl)-1'-bromo ferrocene (**3cb**)

Yellow solid (41 mg, 28% yield, 96% ee). Analytical data for **3cb**: Mp = 87–89 °C;  $[\alpha]_D^{20} = -59.7^\circ$  ( $c = 0.29$  chloroform, 96% ee).  $^1\text{H NMR}$  (400 MHz,  $\text{CDCl}_3$ )  $\delta$  2.09 (s, 3H), 2.15 (s, 3H), 2.25 (s, 6H), 2.32 (s, 3H), 2.45 (s, 3H), 3.00 (d,  $J = 14.0$  Hz, 1H), 3.77–3.80 (m, 2H), 3.85 (t,  $J = 2.8$  Hz, 1H), 4.00 (dd,  $J_1 = 4.0$  Hz,  $J_2 = 2.4$  Hz, 1H), 4.15 (dd,  $J_1 = 4.0$  Hz,  $J_2 = 2.4$  Hz, 1H), 4.38–4.39 (m, 2H), 4.64 (br, 1H), 6.35 (dd,  $J_1 = 7.6$  Hz,  $J_2 = 1.6$  Hz, 1H), 6.41 (d,  $J = 7.2$  Hz, 1H), 6.55 (d,  $J = 8.0$  Hz, 1H), 6.62–6.74 (series of m, 5H), 6.80 (dd,  $J_1 = 8.0$  Hz,  $J_2 = 1.6$  Hz, 1H), 6.89 (dt,  $J_1 = 8.0$  Hz,  $J_2 = 0.8$  Hz, 1H), 7.16 (d,  $J = 7.6$  Hz, 1H), 7.32 (dd,  $J_1 = 8.0$  Hz,  $J_2 = 1.6$  Hz, 1H), 7.38 (s, 1H), 7.52 (dd,  $J_1 = 8.4$  Hz,  $J_2 = 1.6$  Hz, 1H), 9.73 (d,  $J = 8.8$  Hz, 1H);  $^{13}\text{C NMR}$  (100 MHz,  $\text{CDCl}_3$ )  $\delta$  21.00, 21.04, 21.21, 21.7, 45.5, 56.4, 68.2, 68.6, 69.3, 70.2, 71.3, 73.2, 74.3, 79.5, 87.8, 126.0, 126.1, 127.00, 127.08, 127.10, 127.12, 127.7, 128.4, 128.6, 129.2, 130.69, 130.92, 130.99, 131.16, 131.24, 131.7, 132.4, 134.1, 134.4, 135.0, 135.4, 136.8, 137.9, 138.1, 139.07, 139.16, 141.8; IR (film) 3421, 3021, 2920, 1814, 2761, 2602, 2496, 1508, 1151, 1107, 1022, 869, 834, 815, 742, 668  $\text{cm}^{-1}$ ; HRMS (ESI): Exact mass calcd for  $\text{C}_{45}\text{H}_{43}\text{BrFeN}^+$  ( $\text{M}+\text{H}$ ) requires  $m/z$  732.1923, found  $m/z$  732.1919. The enantiomeric excess was determined by phenomenex cellulose-4 (25 cm),  $\text{CH}_3\text{CN}/\text{IPA} = 95/5$ , 0.5 mL/min,  $\lambda = 254$  nm,  $t$  (major) = 17.027 min,  $t$  (minor) = 16.227 min.

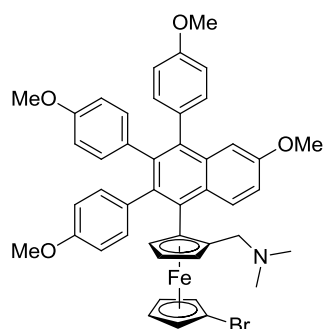

(*S<sub>p</sub>*)-1-[(*N,N*-Dimethylamino)methyl]-2-(6-methoxy-2,3,4-tris(4-methoxyphenyl)naphthalen-1-yl)-1'-bromo ferrocene (**3cc**)

Yellow solid (64 mg, 40% yield, 96% ee). Analytical data for **3cc**: Mp = 90–92 °C;  $[\alpha]_D^{20} = -80.7^\circ$  ( $c = 0.30$  chloroform, 96% ee).  $^1\text{H NMR}$  (400 MHz,  $\text{CDCl}_3$ )  $\delta$  2.22 (s, 6H), 2.98 (d,  $J = 13.6$  Hz, 1H), 3.62 (s, 3H), 3.66 (s, 3H), 3.68 (d,  $J = 18.4$  Hz, 1H), 3.75 (s, 3H), 3.76 (dd,  $J_1 = 2.4$  Hz,  $J_2 = 1.6$  Hz, 1H), 3.79 (s, 3H), 3.88 (t,  $J = 2.8$  Hz, 1H), 4.00 (td,  $J_1 = 2.8$  Hz,  $J_2 = 1.2$  Hz, 1H), 4.14 (td,  $J_1 = 2.8$  Hz,  $J_2 = 1.2$  Hz, 1H), 4.36–4.38 (m, 2H), 4.58 (s, 1H), 6.31–6.48 (series of m, 6H), 6.63 (t,  $J = 2.4$  Hz, 1H), 6.65 (t,  $J = 2.0$  Hz, 1H), 6.76 (dd,  $J_1 = 8.4$  Hz,  $J_2 = 2.4$  Hz, 1H), 6.81 (dd,  $J_1 = 8.4$  Hz,  $J_2 = 2.4$  Hz, 1H), 6.90 (dd,  $J_1 = 8.4$  Hz,  $J_2 = 2.4$  Hz, 1H), 7.96 (d,  $J = 2.8$  Hz, 1H), 7.34–7.38 (m, 2H), 9.80 (d,  $J = 9.6$  Hz, 1H);  $^{13}\text{C NMR}$  (100 MHz,  $\text{CDCl}_3$ )  $\delta$  45.6, 54.84, 54.96, 55.03, 55.11, 56.4, 68.2, 68.7, 69.3, 70.2, 71.4, 73.1, 74.2, 79.4, 87.8, 105.7, 111.9, 112.1, 112.7, 113.3, 115.8, 126.5, 130.5, 131.1, 131.96, 132.10, 132.12, 132.21, 132.28, 132.9, 133.6, 133.8, 134.7, 137.4, 139.6, 140.3, 156.7, 157.0, 157.2, 157.7; IR (film) 3384, 2934, 2833, 2762, 1735, 1610, 1577, 1509, 1459, 1370, 1286, 1286, 1244, 1176, 1035, 828  $\text{cm}^{-1}$ ; HRMS (ESI): Exact mass calcd for  $\text{C}_{45}\text{H}_{43}\text{BrFeNO}_4^{+1}$  (M+H) requires  $m/z$  796.1719, found  $m/z$  796.1714. The enantiomeric excess was determined by phenomenex cellulose-4 (25 cm),  $\text{CH}_3\text{CN}/\text{IPA} = 95/5$ , 0.5 mL/min,  $\lambda = 254$  nm,  $t$  (major) = 9.277 min,  $t$  (minor) = 8.377 min.

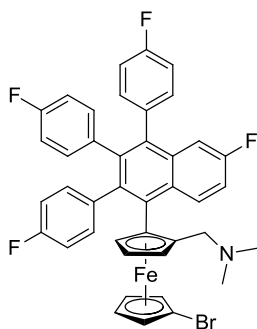

(*S<sub>p</sub>*)-1-[(*N,N*-Dimethylamino)methyl]-2-(6-methoxy-2,3,4-tris(4-methoxyphenyl)naphthalen-1-yl)ferrocene (**3cd**)

Yellow solid (45 mg, 30% yield, 92% ee). Analytical data for **3cd**: Mp = 94–96 °C;  $[\alpha]_D^{20} = -9.7^\circ$  ( $c = 0.31$  chloroform, 92% ee).  $^1\text{H}$  NMR (300 MHz,  $\text{CDCl}_3$ )  $\delta$  2.27 (s, 6H), 3.11 (d,  $J = 13.5$  Hz, 1H), 3.71–3.75 (m, 2H), 3.97 (br, 1H), 4.05 (br, 1H), 4.18 (br, 1H), 4.35 (d,  $J = 0.9$  Hz, 1H), 4.44 (br, 1H), 4.68 (br, 1H), 6.43–6.71 (series of m, 7H), 6.80–6.86 (m, 3H), 7.08 (td,  $J_1 = 8.1$  Hz,  $J_2 = 1.2$  Hz, 1H), 7.20 (dd,  $J_1 = 10.8$  Hz,  $J_2 = 2.7$  Hz, 1H), 7.34–7.39 (td,  $J_1 = 6.9$  Hz,  $J_2 = 1.5$  Hz, 1H), 7.48–7.55 (td,  $J_1 = 8.4$  Hz,  $J_2 = 2.7$  Hz, 1H), 9.98 (dd,  $J_1 = 9.3$  Hz,  $J_2 = 6.0$  Hz, 1H);  $^{13}\text{C}$  NMR (100 MHz,  $\text{CDCl}_3$ )  $\delta$  45.68, 45.80, 56.3, 68.3, 68.8, 69.2, 70.1, 70.5, 72.0, 73.3, 74.1, 79.4, 87.2, 110.1 (d,  $J = 21.8$  Hz), 113.7 (d,  $J = 21.4$  Hz), 113.8 (d,  $J = 21.2$  Hz), 113.9 (d,  $J = 21.3$  Hz), 114.5 (d,  $J = 24.8$  Hz), 114.6 (d,  $J = 21.5$  Hz), 115.2 (d,  $J = 21.2$  Hz), 128.1, 131.5 (d,  $J = 8.3$  Hz), 132.28, 132.33, 132.37, 132.45, 132.52, 132.6 (d,  $J = 7.8$  Hz), 133.0 (d,  $J = 7.7$  Hz), 133.6 (d,  $J = 8.2$  Hz), 134.8 (d,  $J = 3.4$  Hz), 136.1 (d,  $J = 3.3$  Hz), 137.3, 137.4 (d,  $J = 3.1$  Hz), 139.2, 140.7, 160.7 (d,  $J = 244$  Hz), 160.815 (d,  $J = 247$  Hz), 160.824 (d,  $J = 244$  Hz), 161.6 (d,  $J = 245$  Hz);  $^{19}\text{F}$  NMR (376 MHz,  $\text{CDCl}_3$ )  $\delta$  -116.2, -116.1, -115.0, -113.3; IR (film) 2941, 2814, 2765, 2604, 2498, 1625, 1604, 1513, 1368, 1228, 1156, 1093, 1039, 1015, 872, 847, 831, 819, 785  $\text{cm}^{-1}$ ; HRMS (ESI): Exact mass calcd for  $\text{C}_{41}\text{H}_{31}\text{BrF}_4\text{FeN}^+$  ( $\text{M}+\text{H}$ ) requires  $m/z$  748.0920, found  $m/z$  748.0920. The enantiomeric excess was determined by Daicel Chiralcel OD-H (25 cm), hexanes/IPA = 98/2, 0.3 mL/min,  $\lambda = 254$  nm,  $t$  (major) = 20.938 min,  $t$  (minor) = 17.655 min.

## Synthesis of (*S<sub>p</sub>*)-L1

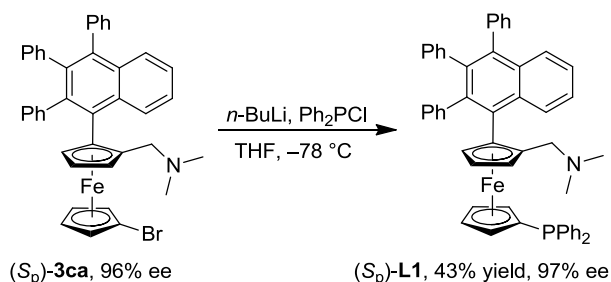

To a solution of compound (*S<sub>p</sub>*)-**3ca** (610 mg, 0.90 mmol) in THF (10 mL) was added *n*-BuLi (0.68 mL, 1.08 mmol, 1.6 M in *n*-hexane) at  $-78\text{ }^\circ\text{C}$  under argon. The resulting deep red solution was stirred for 30 min. Then chlorodiphenylphosphine (0.194 mL, 1.08 mmol) was added. The mixture was warmed slowly to  $0\text{ }^\circ\text{C}$  and stirred for 1 h. Then the reaction mixture was quenched with water, extracted with ethyl acetate. The combined organic layers were washed with brine, dried over  $\text{Na}_2\text{SO}_4$ , and filtrated. After the solvent was removed under reduced pressure, the residue was purified by silica gel column chromatography (dichloromethane/methanol = 1/100, v/v) to give (*S<sub>p</sub>*)-**L1** (306 mg, 43% yield, 97% ee) as an orange solid. Analytical data for (*S<sub>p</sub>*)-**L1**: Mp =  $93\text{--}95\text{ }^\circ\text{C}$ ;  $[\alpha]_{\text{D}}^{20} = -130.6^\circ$  ( $c = 0.63$  chloroform, 97% ee).  $^1\text{H}$  NMR (400 MHz,  $\text{CDCl}_3$ )  $\delta$  2.18 (s, 6H), 3.11 (d,  $J = 13.6$  Hz, 1H), 3.62 (d,  $J = 13.6$  Hz, 1H), 3.76 (br, 1H), 3.78 (t,  $J = 2.4$  Hz, 1H), 4.04 (s, 1H), 4.13 (br, 1H), 4.39 (br, 1H), 4.48 (br, 1H), 4.52 (br, 1H), 6.47 (d,  $J = 7.6$  Hz, 1H), 6.53 (d,  $J = 7.2$  Hz, 1H), 6.72 (td,  $J_1 = 7.6$  Hz,  $J_2 = 0.8$  Hz, 1H), 6.76–6.90 (series of m, 7H), 6.96 (d,  $J = 7.6$  Hz, 1H), 7.02–7.08 (m, 3H), 7.11–7.31 (series of m, 9H), 7.33–7.38 (m, 2H), 7.48 (d,  $J = 7.6$  Hz, 1H), 7.534 (td,  $J_1 = 9.4$  Hz,  $J_2 = 1.2$  Hz, 1H), 7.59 (d,  $J = 8.4$  Hz, 1H), 9.86 (d,  $J = 8.4$  Hz, 1H);  $^{13}\text{C}$  NMR (100 MHz,  $\text{CDCl}_3$ )  $\delta$  45.2, 57.8, 66.8, 70.6, 73.3, 73.51, 73.58, 73.62, 74.07, 74.10, 74.19, 74.95, 75.07, 76.55, 76.61, 86.7, 123.8, 125.17, 125.32, 123.6, 126.36, 126.42, 126.44, 126.46, 126.6, 127.09, 127.16, 127.74, 127.79, 127.80, 128.10, 128.17, 128.24, 128.56, 128.75, 130.97, 131.00, 131.18, 131.27, 131.33, 132.0, 132.2, 133.3 (d,  $J = 18.6$  Hz), 133.5 (d,  $J = 19.2$  Hz), 138.45, 138.54, 138.74, 138.83, 138.94, 139.7, 140.7, 142.0, 142.4;  $^{31}\text{P}$  NMR (161 MHz,  $\text{CDCl}_3$ )  $\delta$   $-18.05$ ; IR (film) 3054, 2941, 2854, 2813, 2765, 1737, 1601, 1434, 1370, 1265, 1160, 1071, 1027, 846, 789, 772, 739, 698  $\text{cm}^{-1}$ ; HRMS (ESI): Exact mass

calcd for  $C_{53}H_{45}FeNP^{+1}$  (M+H) requires  $m/z$  782.2634, found  $m/z$  782.2643. The enantiomeric excess was determined by phenomenex cellulose-2 (25 cm), hexanes/EtOH = 94/6, 0.7 mL/min,  $\lambda$  = 254 nm,  $t$  (major) = 8.690 min,  $t$  (minor) = 7.317 min.

Pd-catalyzed allylic amination reaction with (*S<sub>p</sub>*)-**L1**

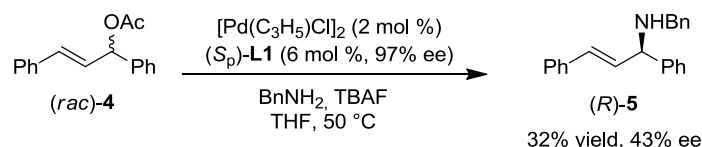

[Pd(C<sub>3</sub>H<sub>5</sub>)Cl]<sub>2</sub> (1.5 mg, 0.004 mmol) and ligand (*S<sub>p</sub>*)-**L1** (9.4 mg, 0.012 mmol, 99% ee) were dissolved in dry THF (0.5 mL), and the mixture was stirred for 30 min at rt under argon. To this solution were successively added (*rac*)-**4** (50.4 mg, 0.2 mmol), BnNH<sub>2</sub> (42.8 mg, 0.4 mmol), and TBAF (1 M in THF, 0.4 mL, 0.4 mmol). The reaction mixture was stirred at 50 °C for 14 h. After completion, the reaction mixture was diluted with Et<sub>2</sub>O (20 mL) and washed twice with ice-cold saturated aqueous ammonium chloride. The organic phase was dried over anhydrous Na<sub>2</sub>SO<sub>4</sub> and then concentrated under reduced pressure. The residue was purified by preparative TLC (ethyl acetate/petroleum = 1/10) to give (*R*)-**5** (19.1 mg, 32% yield, 43% ee). Analytical data for (*R*)-**5**:  $[\alpha]_D^{20} = -14.24^\circ$  ( $c = 0.25$  chloroform, 43% ee). <sup>1</sup>H NMR (300 MHz, CDCl<sub>3</sub>)  $\delta$  1.84 (s, 1H), 3.78 (s, 2H), 4.39 (d,  $J = 6.9$  Hz, 1H), 6.31 (dd,  $J_1 = 15.9$  Hz,  $J_2 = 7.2$  Hz, 1H), 6.57 (d,  $J = 15.9$  Hz, 1H) 7.20–7.42 (series of m, 15H); The enantiomeric excess was determined by Diacel Chiralcel OJ-H (25 cm), hexanes/IPA = 90/10, 0.6 mL/min,  $\lambda$  = 254 nm,  $t$  (minor) = 18.40 min,  $t$  (major) = 22.07 min. The absolute configuration of the product (*R*)-**5** was assigned as (*R*) by comparing the optical rotation with that reported in the literature [5].



### Pd-catalyzed allylic alkylation reaction with (*S<sub>p</sub>*)-**L1**

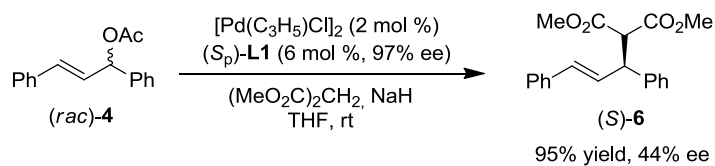

A mixture of ligand (*S<sub>p</sub>*)-**L1** (9.4 mg, 0.012 mmol, 97% ee) and [Pd(C<sub>3</sub>H<sub>5</sub>)Cl]<sub>2</sub> (1.5 mg, 0.004 mmol) in dry THF (2 mL) was stirred at room temperature for 0.5 h, and to the resulting yellow solution was added **4** (50.4 mg, 0.2 mmol). After an additional stirring for 10 min, sodium dimethyl malonate [generated in situ by adding dimethyl malonate (79.2 mg, 0.6 mmol) and sodium hydride (14.4 mg, 0.6 mmol) in 1 mL THF] was added. The reaction was stirred at room temperature. After completion of the reaction (monitored by TLC), the reaction mixture was quenched with NH<sub>4</sub>Cl (aq.) and extracted with ether. The combined organic layers were washed with brine, dried over anhydrous Na<sub>2</sub>SO<sub>4</sub> and filtrated. After the solvent was removed under reduced pressure, the residue was purified by silica gel column chromatography (ethyl acetate/petroleum = 1/15) to give (*S*)-**6** (61 mg, 94% yield, 44% ee). Analytical data for (*S*)-**6**<sup>[6]</sup>: [α]<sub>D</sub><sup>20</sup> = -8.8° (*c* = 1.4 chloroform, 44% ee). <sup>1</sup>H NMR (300 MHz, CDCl<sub>3</sub>) δ 3.52 (s, 3H), 3.70 (s, 3H), 3.96 (d, *J* = 10.8 Hz, 1H), 4.27 (dd, *J* = 8.8, 10.4 Hz, 1H), 6.33 (dd, *J* = 8.4, 15.9 Hz, 1H), 6.48 (d, *J* = 15.6 Hz, 1H), 7.17–7.33 (series of m, 10H); The enantiomeric excess was determined by Diacel Chiralcel OD-H (25 cm), hexanes/IPA = 90/10, 0.7 mL/min, λ = 254 nm, *t* (minor) = 8.507 min, *t* (major) = 9.140 min. The absolute configuration of the product (*S*)-**6** was assigned as (*S*) by comparing the optical rotation with that reported in the literature [6].

### References

- (1) Khrushcheva, N. S.; Sokolov, V. I. *Russ. Chem. Bull.* **2004**, *53*, 830–833.
- (2) Bhat, A. R.; Bhat, A. I.; Athar, F.; Azam, A. *Helv. Chim. Act.* **2009**, *92*, 1644–1656.
- (3) Michael, W.; Ulrike, N.; Kurt, M. *Tetrahedron: Asymmetry* **1999**, *10*, 4369–4391.
- (4) Mio, M. J.; Kopel, L. C.; Braun, J. B.; Gadzikwa, T. L.; Hull, K. L.; Brisbois, R. G.; Markworth, C. J.; Grieco, P. A. *Org. Lett.* **2002**, *4*, 3199–3202

- (5) Hayashi, T.; Yamamoto, A.; Ito, Y.; Nishioka, E.; Miura, H.; Yanagi, K. *J. Am. Chem. Soc.* **1989**, *111*, 6301–6311.
- (6) Hayashi, T.; Yamamoto, A.; Hagihara, T.; Ito, Y. *Tetrahedron Lett.* **1986**, *27*, 191–194.





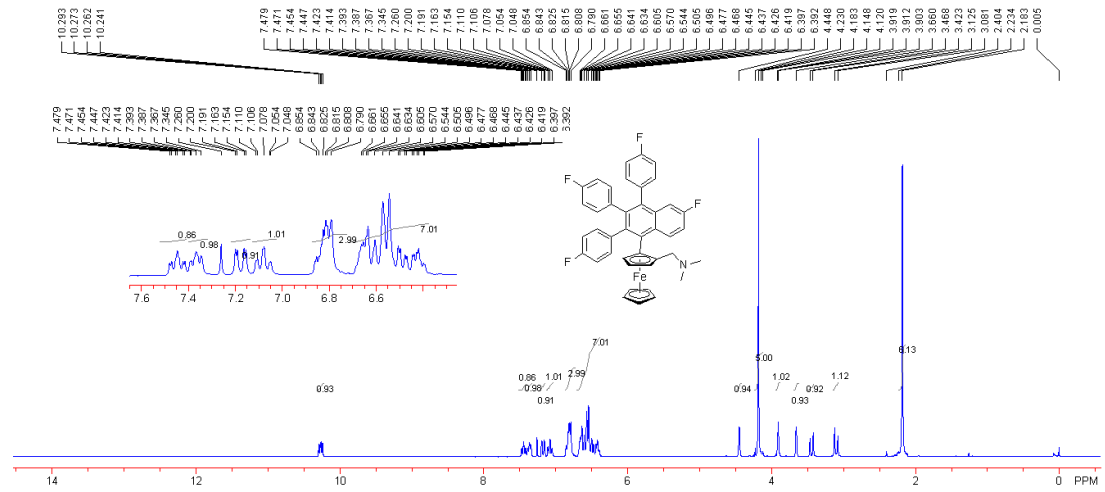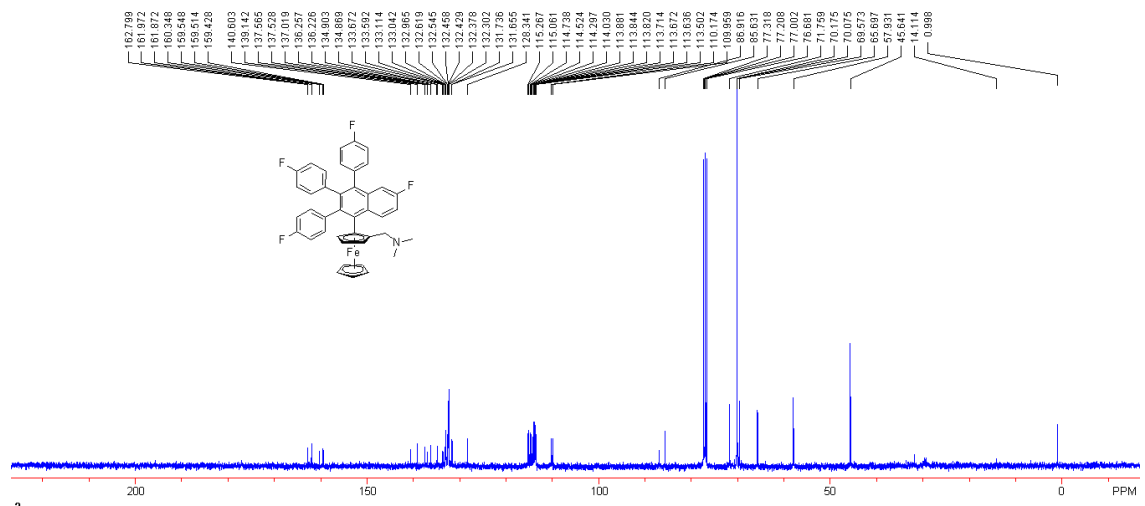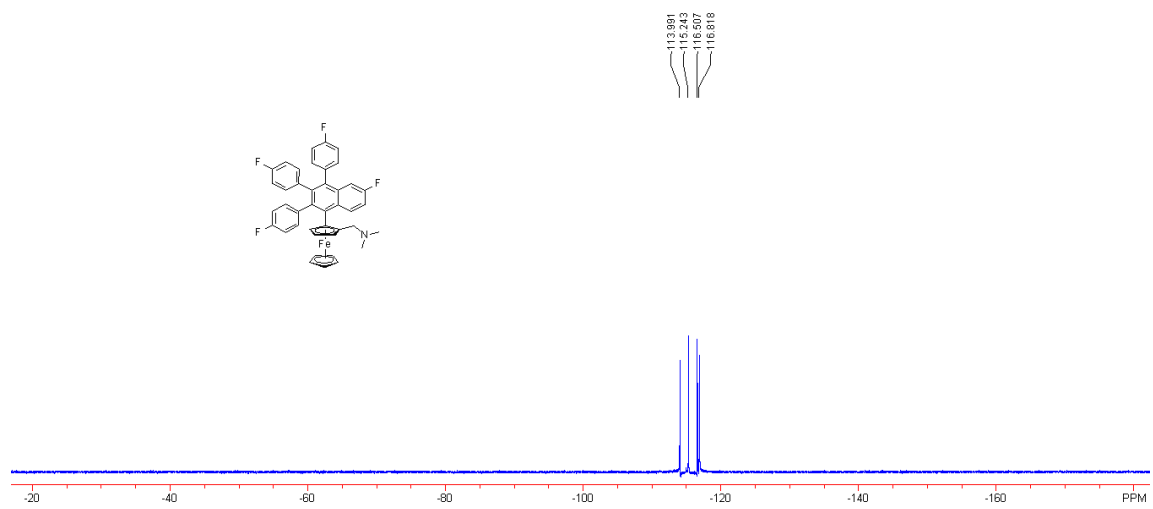















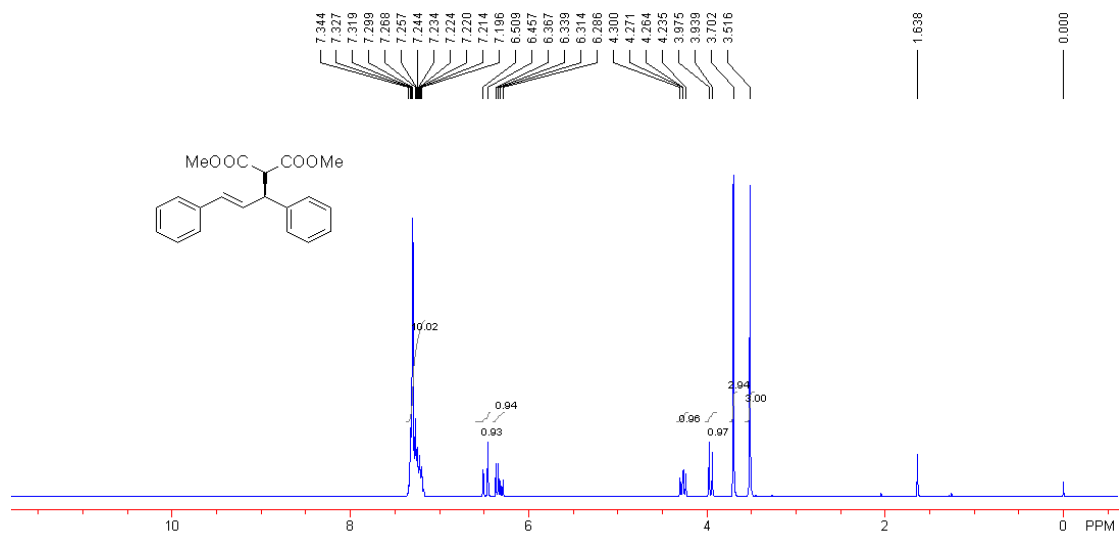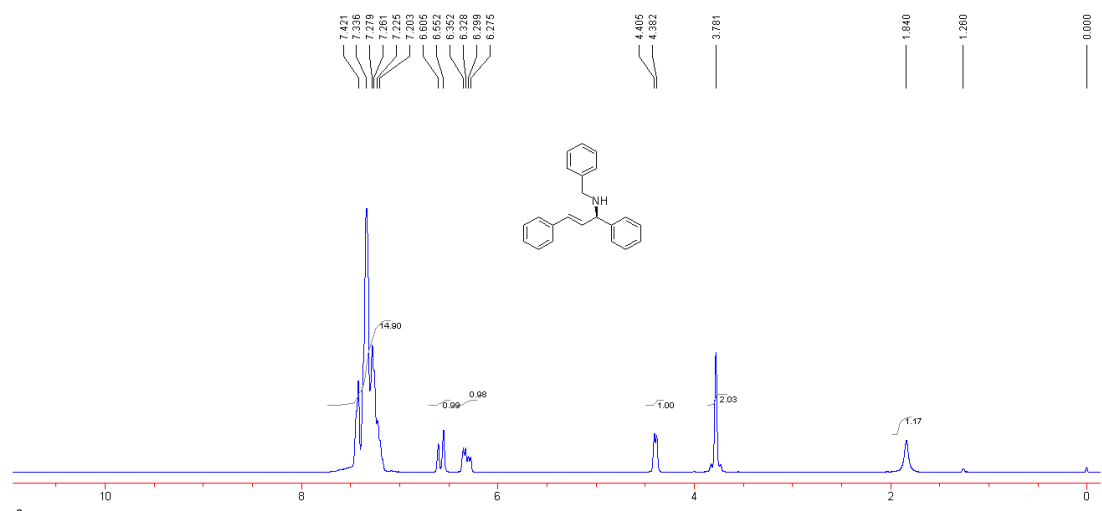

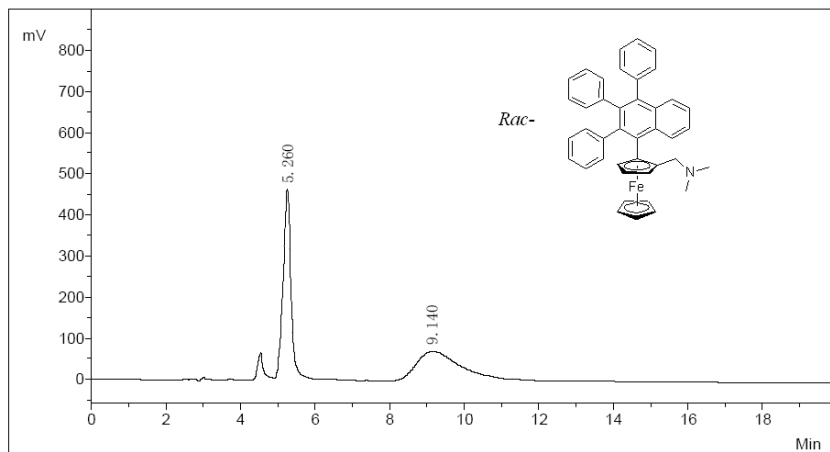

| No.   | PeakNo | ID. Name | R. Time | PeakHeight | PeakArea   | PerCent  |
|-------|--------|----------|---------|------------|------------|----------|
| 1     | 1      |          | 5.260   | 455177.3   | 6524683.9  | 51.0654  |
| 2     | 2      |          | 9.140   | 71564.6    | 6252421.1  | 48.9346  |
| Total |        |          |         | 526741.9   | 12777105.0 | 100.0000 |

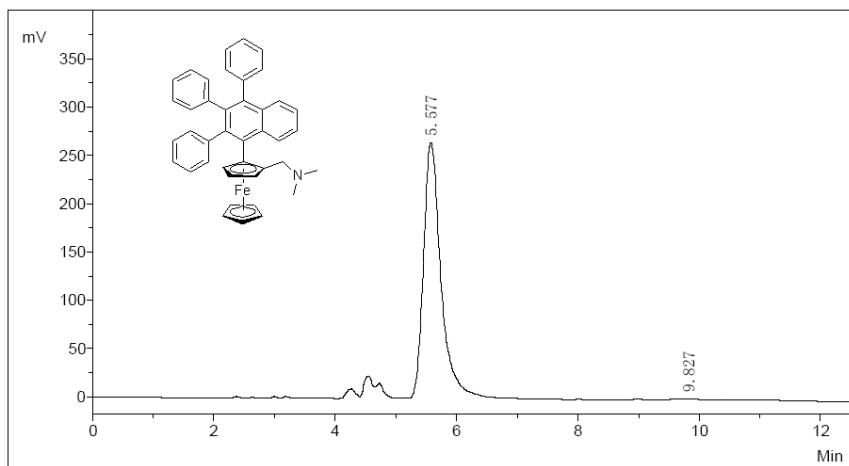

| No.   | PeakNo | ID. Name | R. Time | PeakHeight | PeakArea  | PerCent  |
|-------|--------|----------|---------|------------|-----------|----------|
| 1     | 1      |          | 5.577   | 264324.1   | 5263154.8 | 99.0179  |
| 2     | 2      |          | 9.827   | 1280.4     | 52201.6   | 0.9821   |
| Total |        |          |         | 265604.5   | 5315356.5 | 100.0000 |

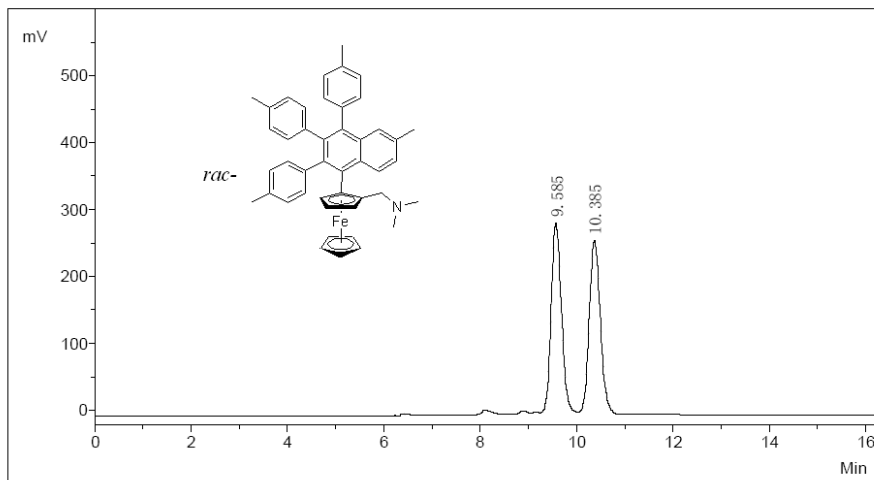

| No.   | PeakNo | ID. Name | R. Time | PeakHeight | PeakArea  | PerCent  |
|-------|--------|----------|---------|------------|-----------|----------|
| 1     | 1      |          | 9.585   | 282080.5   | 4217669.7 | 50.9092  |
| 2     | 2      |          | 10.385  | 256623.8   | 4067027.2 | 49.0908  |
| Total |        |          |         | 538704.3   | 8284697.0 | 100.0000 |

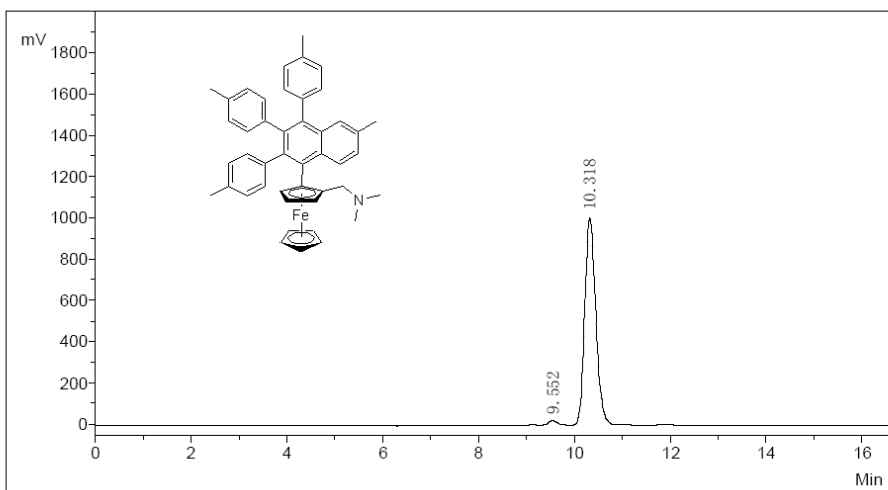

| No.   | PeakNo | ID. Name | R. Time | PeakHeight | PeakArea   | PerCent  |
|-------|--------|----------|---------|------------|------------|----------|
| 1     | 1      |          | 9.552   | 20173.1    | 283294.8   | 1.7260   |
| 2     | 2      |          | 10.318  | 1004494.0  | 16129919.7 | 98.2740  |
| Total |        |          |         | 1024667.0  | 16413214.5 | 100.0000 |

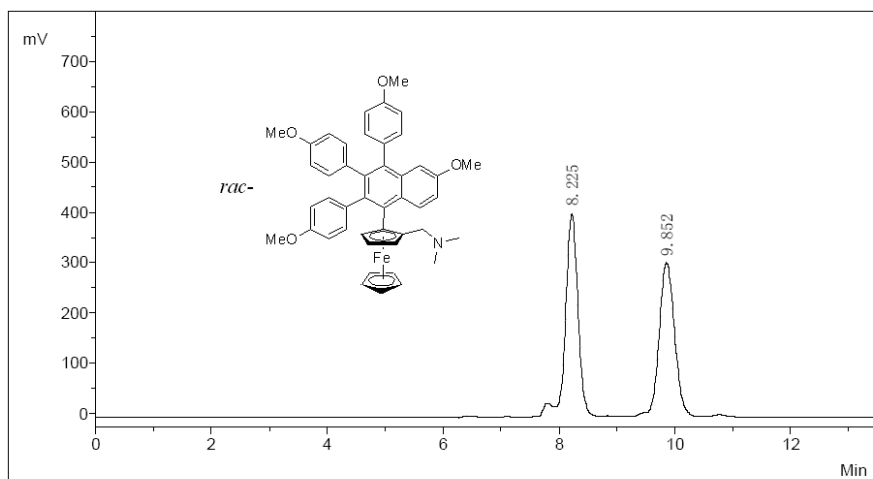

| No.   | PeakNo | ID. Name | R. Time | PeakHeight | PeakArea   | PerCent  |
|-------|--------|----------|---------|------------|------------|----------|
| 1     | 1      |          | 8.225   | 392907.1   | 5355204.4  | 48.5611  |
| 2     | 2      |          | 9.852   | 306171.9   | 5672562.1  | 51.4389  |
| Total |        |          |         | 699079.1   | 11027766.5 | 100.0000 |

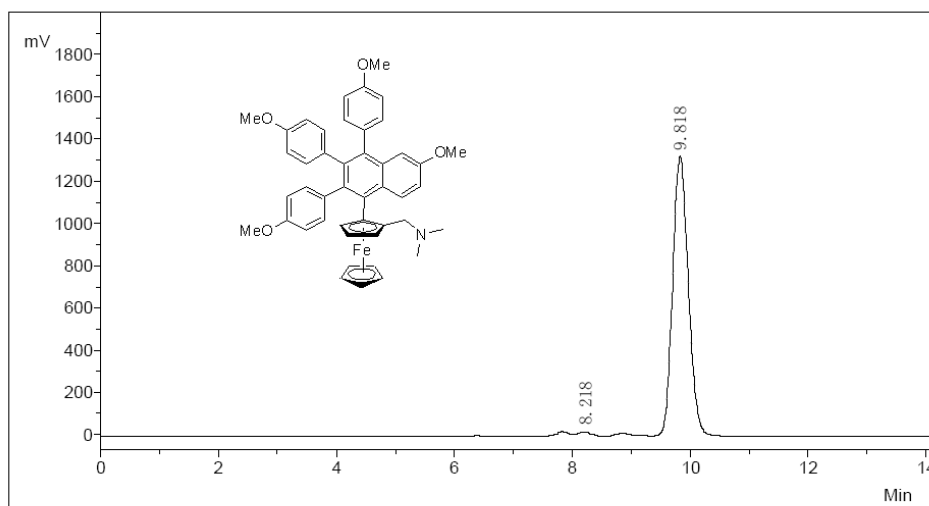

| No.   | PeakNo | ID. Name | R. Time | PeakHeight | PeakArea   | PerCent  |
|-------|--------|----------|---------|------------|------------|----------|
| 1     | 1      |          | 8.218   | 13115.0    | 143279.9   | 0.5833   |
| 2     | 2      |          | 9.818   | 1317328.3  | 24422418.8 | 99.4167  |
| Total |        |          |         | 1330443.3  | 24565698.7 | 100.0000 |

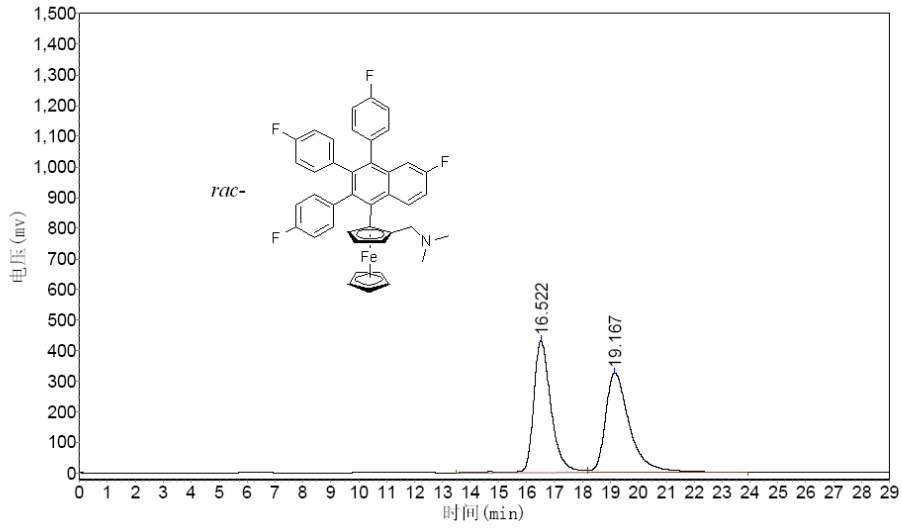

| PeakNo | R. Time | PeakHeight | PeakArea     | PerCent  |
|--------|---------|------------|--------------|----------|
| 1      | 16.522  | 432494.094 | 18804770.000 | 49.0590  |
| 2      | 19.167  | 325761.031 | 19526184.000 | 50.9410  |
| Total  |         | 758255.125 | 38330954.000 | 100.0000 |

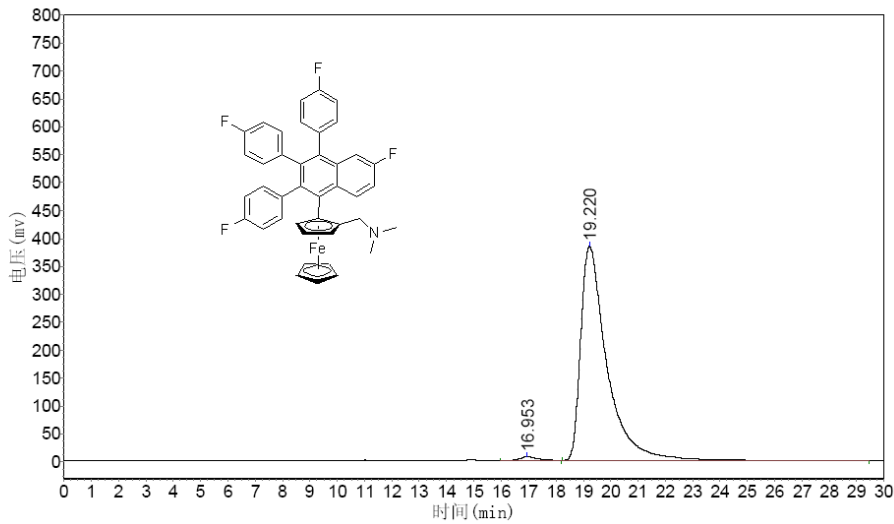

| PeakNo | R. Time | PeakHeight | PeakArea     | PerCent  |
|--------|---------|------------|--------------|----------|
| 1      | 16.953  | 6457.522   | 361496.344   | 1.3749   |
| 2      | 19.220  | 384619.594 | 25931188.000 | 98.6251  |
| Total  |         | 391077.116 | 26292684.344 | 100.0000 |



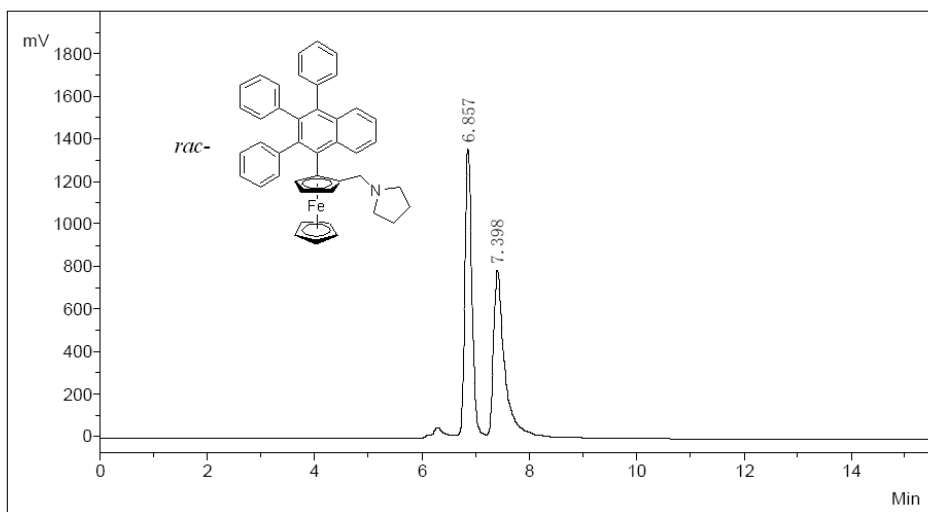

| No.   | PeakNo | ID. Name | R. Time | PeakHeight | PeakArea   | PerCent  |
|-------|--------|----------|---------|------------|------------|----------|
| 1     | 1      |          | 6.857   | 1341416.0  | 11818219.4 | 51.5591  |
| 2     | 2      |          | 7.398   | 772948.8   | 11103491.1 | 48.4409  |
| Total |        |          |         | 2114364.8  | 22921710.5 | 100.0000 |

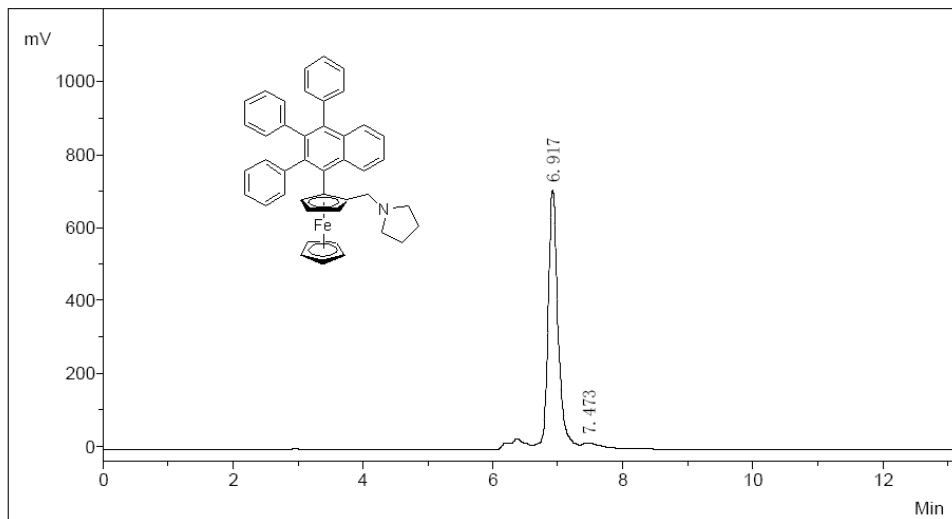

| No.   | PeakNo | ID. Name | R. Time | PeakHeight | PeakArea  | PerCent  |
|-------|--------|----------|---------|------------|-----------|----------|
| 1     | 1      |          | 6.917   | 699828.0   | 7169651.8 | 97.6677  |
| 2     | 2      |          | 7.473   | 12231.9    | 171210.5  | 2.3323   |
| Total |        |          |         | 712059.9   | 7340862.4 | 100.0000 |

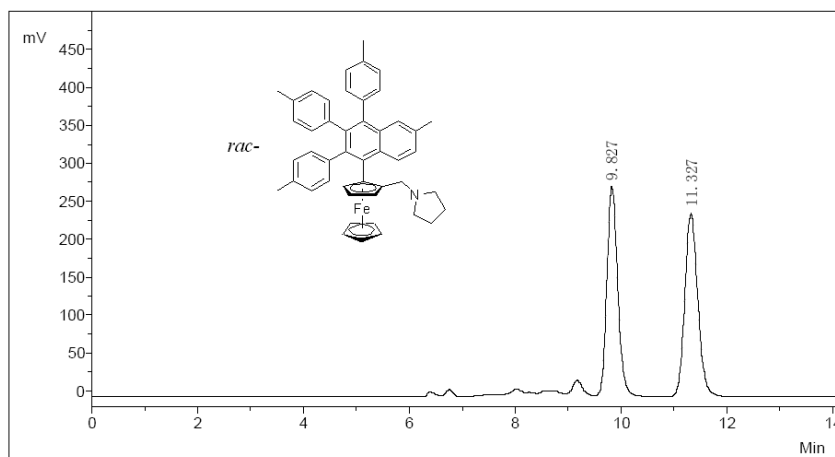

| No.   | PeakNo | ID. Name | R. Time | PeakHeight | PeakArea  | PerCent  |
|-------|--------|----------|---------|------------|-----------|----------|
| 1     | 1      |          | 9.827   | 275220.9   | 3882593.2 | 48.7036  |
| 2     | 2      |          | 11.327  | 240766.1   | 4089283.3 | 51.2964  |
| Total |        |          |         | 515987.0   | 7971876.6 | 100.0000 |

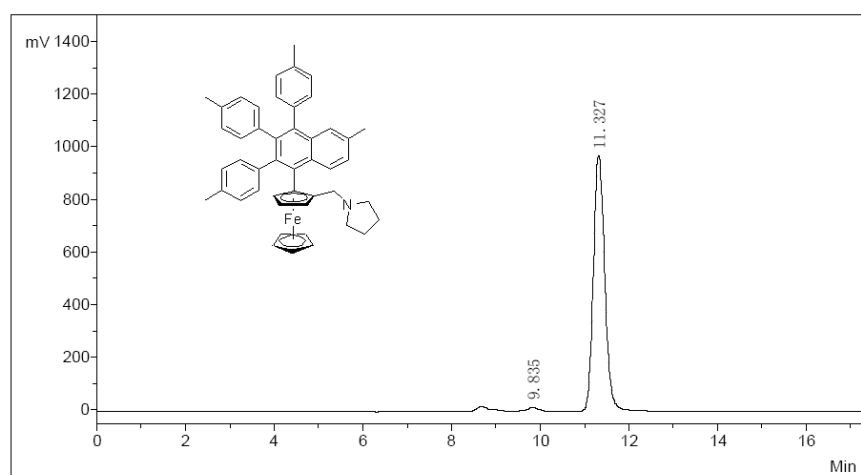

| No.   | PeakNo | ID. Name | R. Time | PeakHeight | PeakArea   | PerCent  |
|-------|--------|----------|---------|------------|------------|----------|
| 1     | 1      |          | 9.835   | 15306.8    | 247486.5   | 1.4074   |
| 2     | 2      |          | 11.327  | 970572.0   | 17337145.5 | 98.5926  |
| Total |        |          |         | 985878.8   | 17584632.0 | 100.0000 |

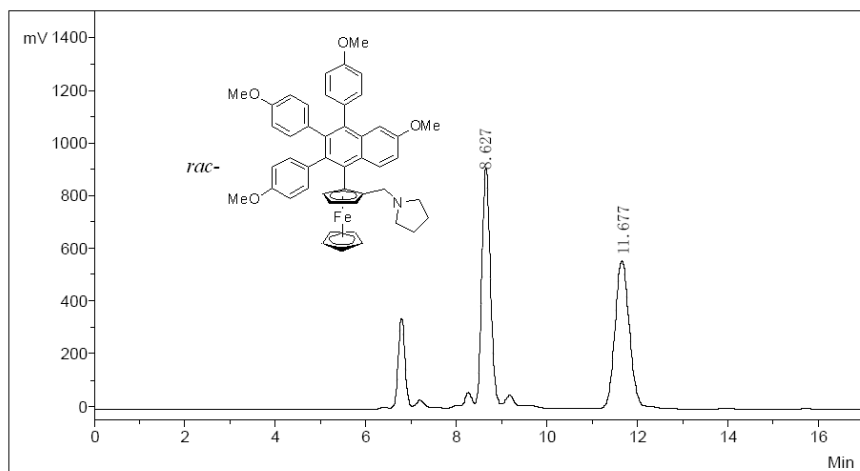

| No.   | PeakNo | ID. Name | R. Time | PeakHeight | PeakArea   | PerCent  |
|-------|--------|----------|---------|------------|------------|----------|
| 1     | 1      |          | 8.627   | 858645.1   | 11436145.9 | 48.8049  |
| 2     | 2      |          | 11.677  | 549721.2   | 11996248.2 | 51.1951  |
| Total |        |          |         | 1408366.3  | 23432394.1 | 100.0000 |

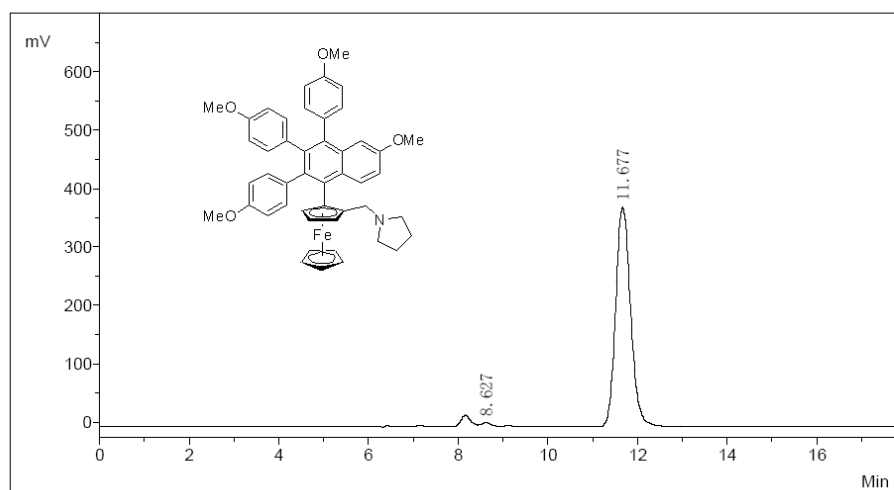

| No.   | PeakNo | ID. Name | R. Time | PeakHeight | PeakArea  | PerCent  |
|-------|--------|----------|---------|------------|-----------|----------|
| 1     | 1      |          | 8.627   | 3837.3     | 45509.4   | 0.5188   |
| 2     | 2      |          | 11.677  | 375535.7   | 8725694.8 | 99.4812  |
| Total |        |          |         | 379373.0   | 8771204.2 | 100.0000 |

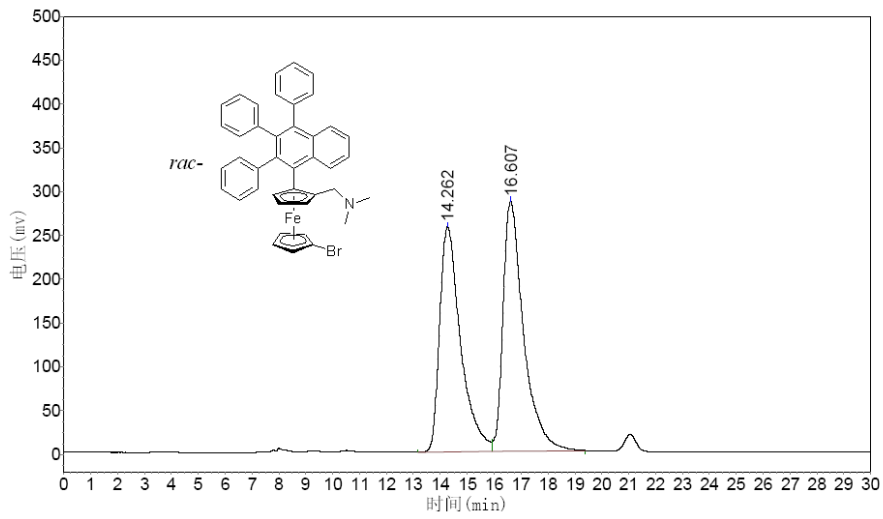

| PeakNo | R. Time | PeakHeight | PeakArea     | PerCent  |
|--------|---------|------------|--------------|----------|
| 1      | 14.262  | 257082.922 | 13896266.000 | 48.0055  |
| 2      | 16.607  | 285364.188 | 15050990.000 | 51.9945  |
| Total  |         | 542447.109 | 28947256.000 | 100.0000 |

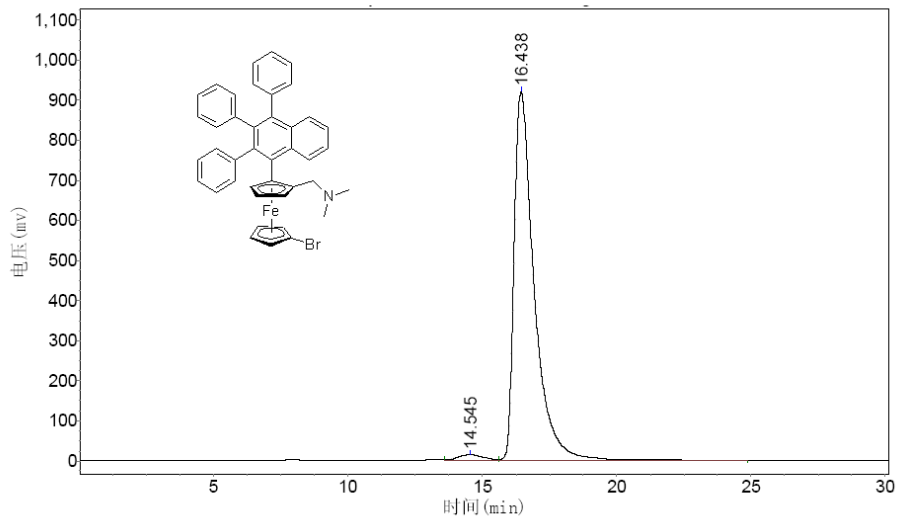

| PeakNo | R. Time | PeakHeight | PeakArea     | PerCent  |
|--------|---------|------------|--------------|----------|
| 1      | 14.262  | 257082.922 | 13896266.000 | 48.0055  |
| 2      | 16.607  | 285364.188 | 15050990.000 | 51.9945  |
| Total  |         | 542447.109 | 28947256.000 | 100.0000 |

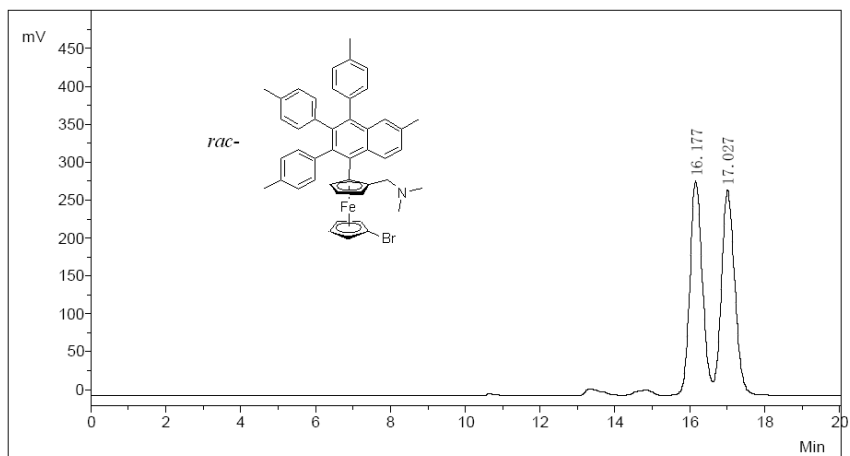

| No.   | PeakNo | ID. Name | R. Time | PeakHeight | PeakArea   | PerCent  |
|-------|--------|----------|---------|------------|------------|----------|
| 1     | 1      |          | 16.177  | 279914.6   | 6534434.8  | 49.2680  |
| 2     | 2      |          | 17.027  | 269295.8   | 6728597.1  | 50.7320  |
| Total |        |          |         | 549210.4   | 13263031.9 | 100.0000 |

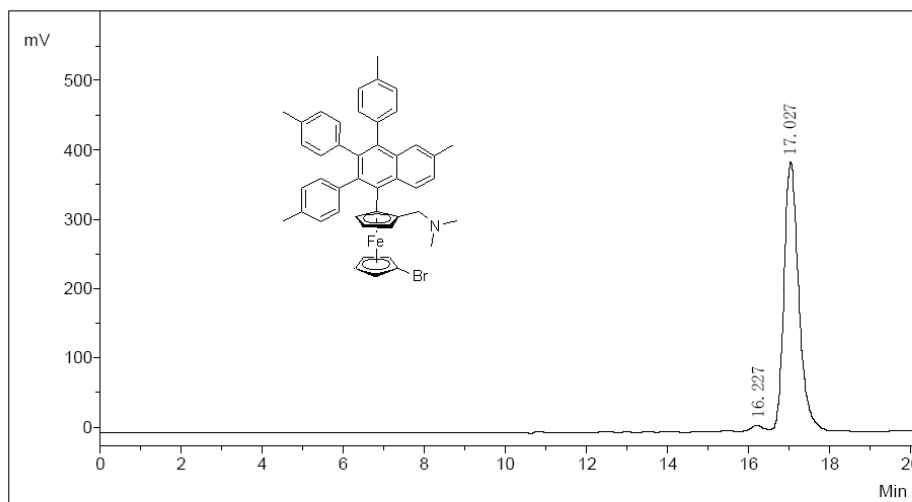

| No.   | PeakNo | ID. Name | R. Time | PeakHeight | PeakArea   | PerCent  |
|-------|--------|----------|---------|------------|------------|----------|
| 1     | 1      |          | 16.227  | 8941.5     | 213167.7   | 2.0942   |
| 2     | 2      |          | 17.027  | 388019.3   | 9965877.3  | 97.9058  |
| Total |        |          |         | 396960.7   | 10179045.0 | 100.0000 |

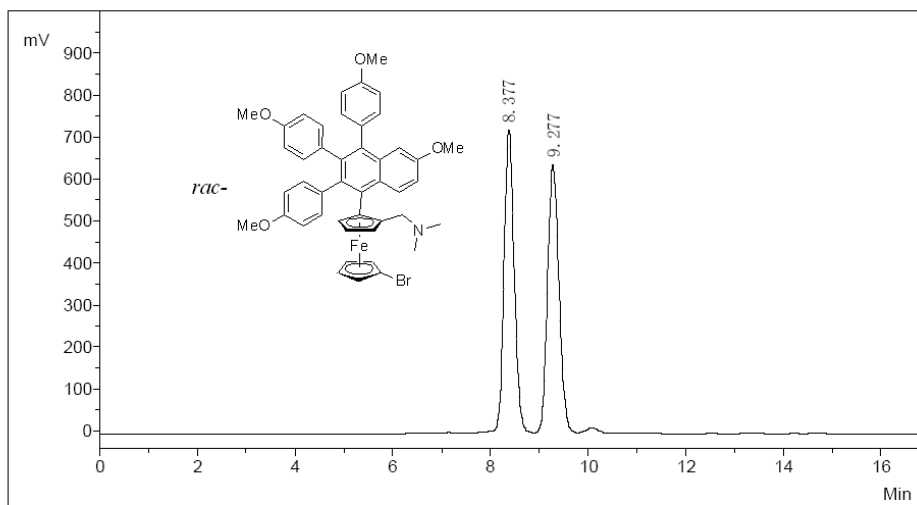

| No.   | PeakNo | ID. Name | R. Time | PeakHeight | PeakArea   | PerCent  |
|-------|--------|----------|---------|------------|------------|----------|
| 1     | 1      |          | 8.377   | 721269.0   | 10584821.6 | 50.4867  |
| 2     | 2      |          | 9.277   | 639616.7   | 10380726.0 | 49.5133  |
| Total |        |          |         | 1360885.7  | 20965547.6 | 100.0000 |

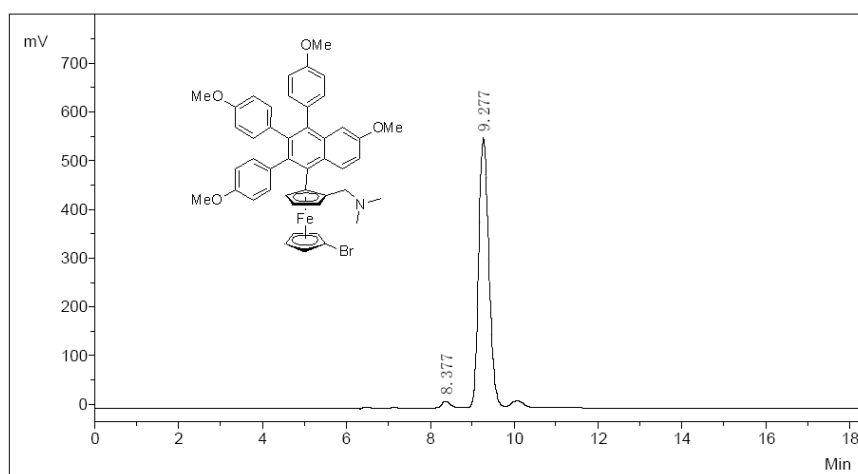

| No.   | PeakNo | ID. Name | R. Time | PeakHeight | PeakArea  | PerCent  |
|-------|--------|----------|---------|------------|-----------|----------|
| 1     | 1      |          | 8.377   | 14377.1    | 208847.4  | 2.2047   |
| 2     | 2      |          | 9.277   | 550513.7   | 9264058.5 | 97.7953  |
| Total |        |          |         | 564890.8   | 9472905.9 | 100.0000 |

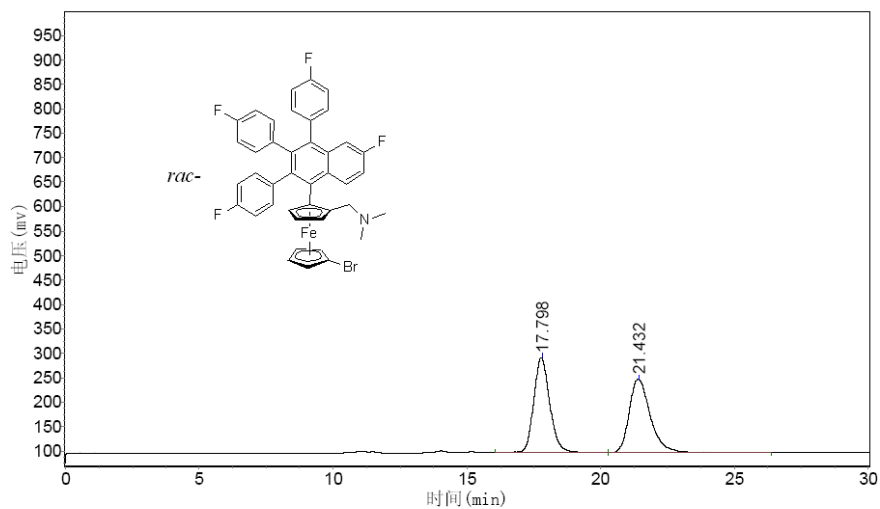

| PeakNo | R. Time | PeakHeight | PeakArea     | PerCent  |
|--------|---------|------------|--------------|----------|
| 1      | 17.798  | 195255.219 | 8292356.000  | 49.7119  |
| 2      | 21.432  | 150282.000 | 8388480.000  | 50.2881  |
| Total  |         | 345537.219 | 16680836.000 | 100.0000 |

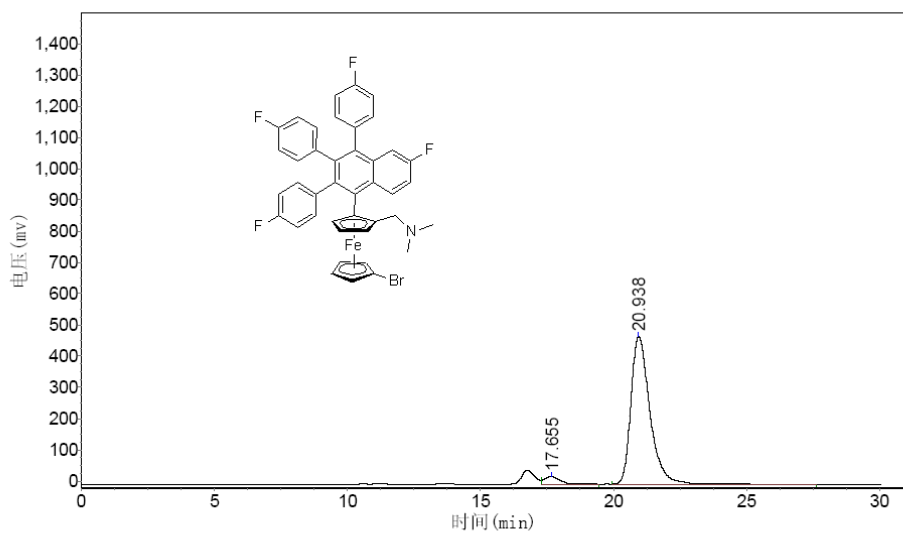

| PeakNo | R. Time | PeakHeight | PeakArea     | PerCent  |
|--------|---------|------------|--------------|----------|
| 1      | 17.655  | 25205.662  | 1033276.938  | 4.2002   |
| 2      | 20.938  | 471440.938 | 23567194.000 | 95.7998  |
| Total  |         | 496646.600 | 24600470.938 | 100.0000 |



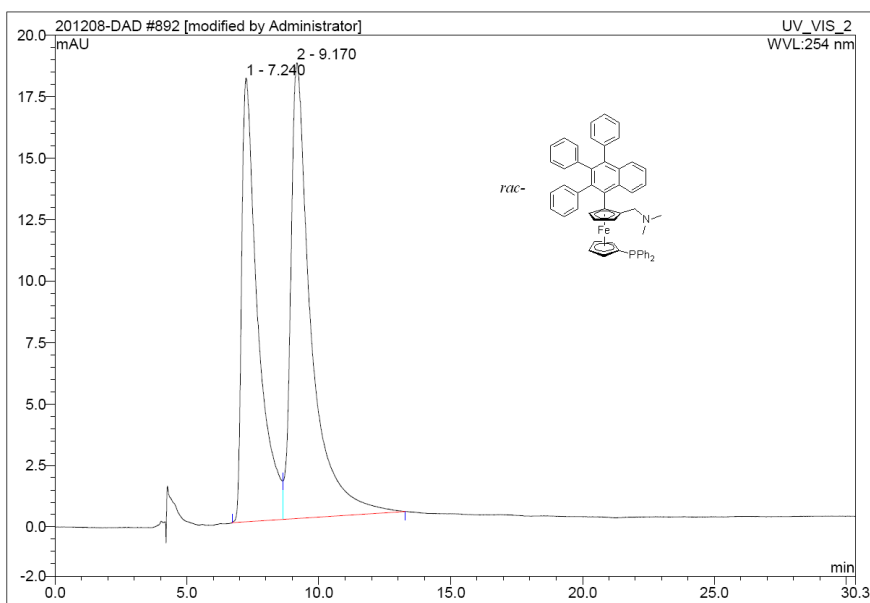

| No.           | Ret.Time<br>min | Peak Name | Height<br>mAU | Area<br>mAU*min | Rel.Area<br>% | Amount | Type |
|---------------|-----------------|-----------|---------------|-----------------|---------------|--------|------|
| 1             | 7.24            | n.a.      | 18.048        | 12.783          | 43.62         | n.a.   | BM * |
| 2             | 9.17            | n.a.      | 18.536        | 16.521          | 56.38         | n.a.   | MB*  |
| <b>Total:</b> |                 |           | 36.584        | 29.303          | 100.00        | 0.000  |      |

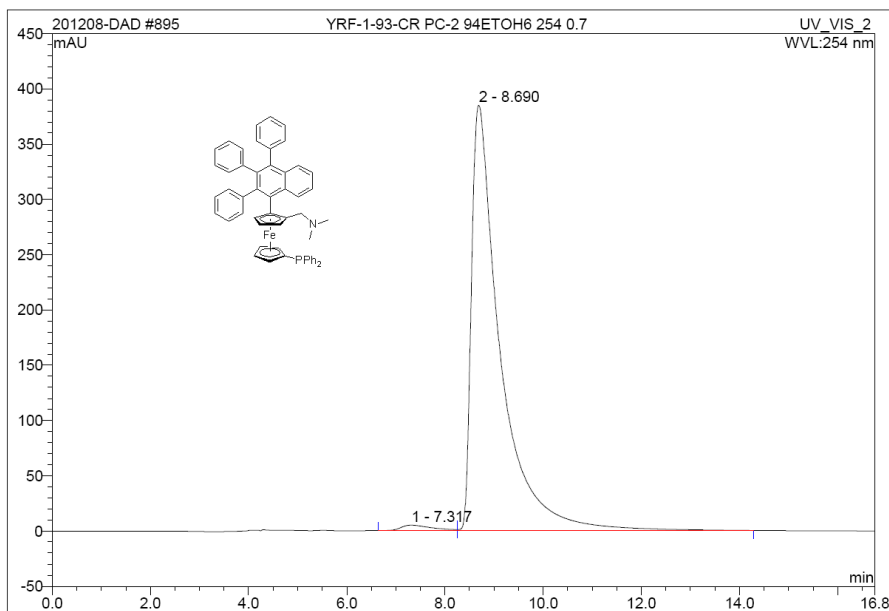

| No.           | Ret.Time<br>min | Peak Name | Height<br>mAU | Area<br>mAU*min | Rel.Area<br>% | Amount | Type |
|---------------|-----------------|-----------|---------------|-----------------|---------------|--------|------|
| 1             | 7.32            | n.a.      | 4.900         | 3.551           | 1.35          | n.a.   | BM   |
| 2             | 8.69            | n.a.      | 384.839       | 259.539         | 98.65         | n.a.   | MB   |
| <b>Total:</b> |                 |           | 389.740       | 263.090         | 100.00        | 0.000  |      |

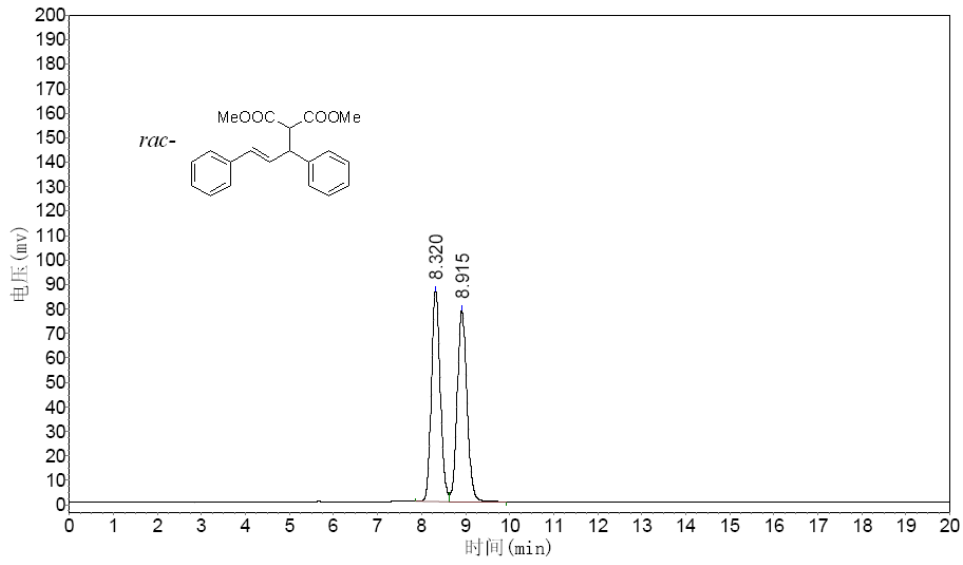

| PeakNo | R. Time | PeakHeight | PeakArea    | PerCent  |
|--------|---------|------------|-------------|----------|
| 1      | 8.320   | 85921.734  | 1200669.500 | 49.6353  |
| 2      | 8.915   | 78175.141  | 1218312.125 | 50.3647  |
| Total  |         | 164096.875 | 2418981.625 | 100.0000 |

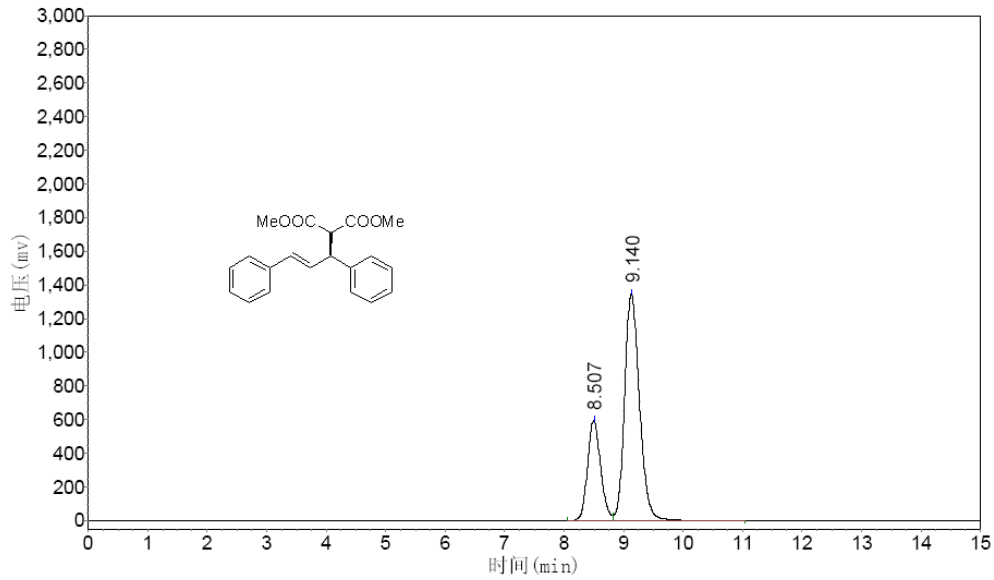

| PeakNo | R. Time | PeakHeight  | PeakArea     | PerCent  |
|--------|---------|-------------|--------------|----------|
| 1      | 8.507   | 591039.375  | 9057392.000  | 27.8780  |
| 2      | 9.140   | 1346444.000 | 23431976.000 | 72.1220  |
| Total  |         | 1937483.375 | 32489368.000 | 100.0000 |

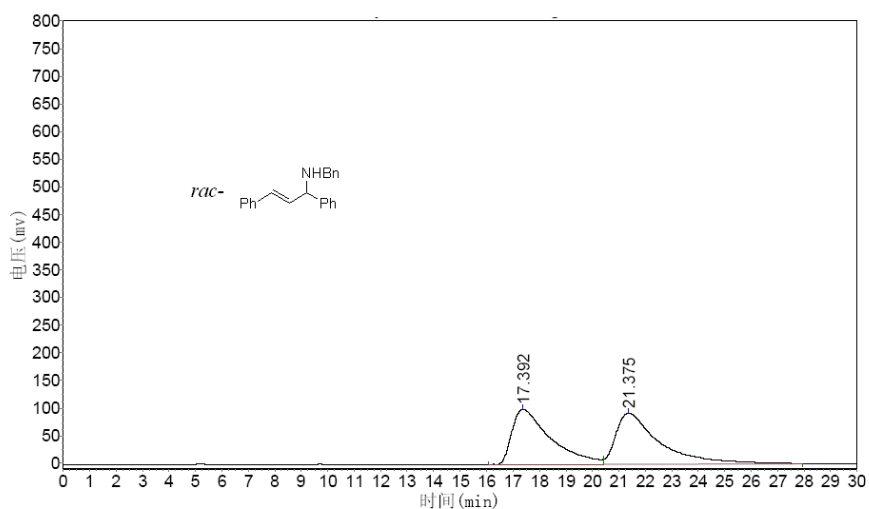

| PeakNo | R. Time | PeakHeight | PeakArea     | PerCent  |
|--------|---------|------------|--------------|----------|
| 1      | 17.392  | 99232.867  | 10057614.000 | 48.9027  |
| 2      | 21.375  | 92170.680  | 10508958.000 | 51.0973  |
| Total  |         | 191403.547 | 20566572.000 | 100.0000 |

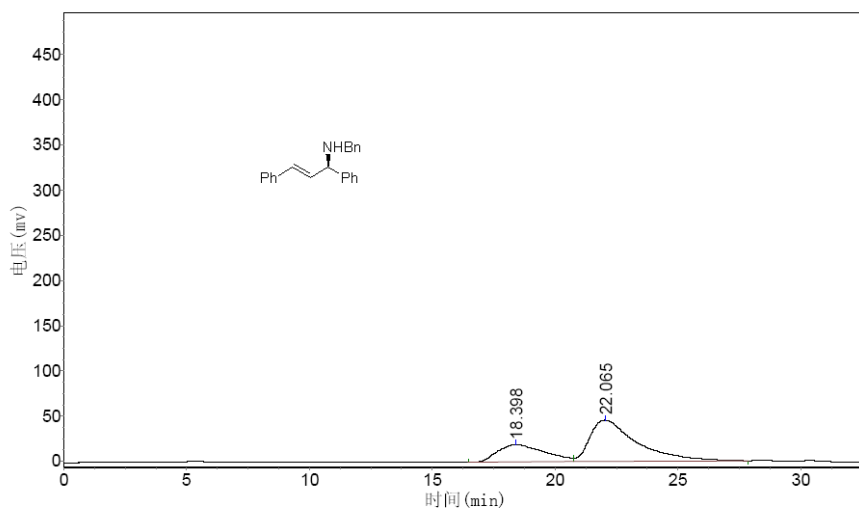

| PeakNo | R. Time | PeakHeight | PeakArea    | PerCent  |
|--------|---------|------------|-------------|----------|
| 1      | 18.398  | 19460.605  | 2660869.750 | 28.5714  |
| 2      | 22.065  | 46957.941  | 6652172.500 | 71.4286  |
| Total  |         | 66418.547  | 9313042.250 | 100.0000 |
